# Supplementary material
Source: PubMed Central journal article supplement (PMC2780761)
Supplement: 0909265106_0909265106SI.pdf [file 0909265106_0909265106SI.pdf]

# Supporting Information

Schoeftner et al. 10.1073/pnas.0909265106

## SI Materials and Methods

Expression microarray background subtraction were carried out using normexp correction. Quantiles method was performed for normalization. Differentially expressed genes were obtained by using R limma package from the Bioconductor Project (<http://www.bioconductor.org/>) (1). The estimated significance level ( $P$  value) was corrected to account for multiple hypotheses testing using Benjamini and Hochberg false discovery rate (FDR) adjustment. Genes showing FDR <0.05 were selected as differentially expressed among classes. Annotations, including chromosome locations for every gene in the array, were retrieved from Ensembl v.50. A Welch 2-sample  $t$  test was used to calculate significance values for global transcriptome changes in pairwise

comparisons. Gene set enrichment analyses: Gene set enrichment analyses (GSEA) were applied using annotations from Biocarta and GenMAPP pathway databases. Thus, genes were ranked based on limma moderated  $t$  statistic. After Kolmogorov–Smirnov testing, those gene sets showing FDR <0.25, a well-established cutoff for the identification of biologically relevant gene sets, were considered enriched between classes under comparison (2). Freely distributed R software was used for these calculations. The FatiGO server was used for analysis for overrepresentation of biological processes (3). The tool applies a Fisher's exact test to obtain significant overrepresentation of GO terms (biological processes) and KEGG pathways. Terms with FDR <0.05 were considered as significantly overrepresented.

1. Smyth GK, Michaud J, Scott HS (2005) Use of within-array replicate spots for assessing differential expression in microarray experiments. *Bioinformatics* 21:2067–2075.
2. Subramanian A, et al. (2005) Gene set enrichment analysis: A knowledge-based approach for interpreting genome-wide expression profiles. *Proc Natl Acad Sci USA* 102:15545–15550.
3. Al-Shahrour F, et al. (2007) FatiGO +: A functional profiling tool for genomic data. Integration of functional annotation, regulatory motifs and interaction data with microarray experiments. *Nucleic Acids Res* 35:W91–W96.
4. Niedernhofer LJ, et al. (2006) A new progeroid syndrome reveals that genotoxic stress suppresses the somatotroph axis. *Nature* 444:1038–1043.
5. Oberdoerffer P, et al. (2008) SIRT1 redistribution on chromatin promotes genomic stability but alters gene expression during aging. *Cell* 135:907–918.

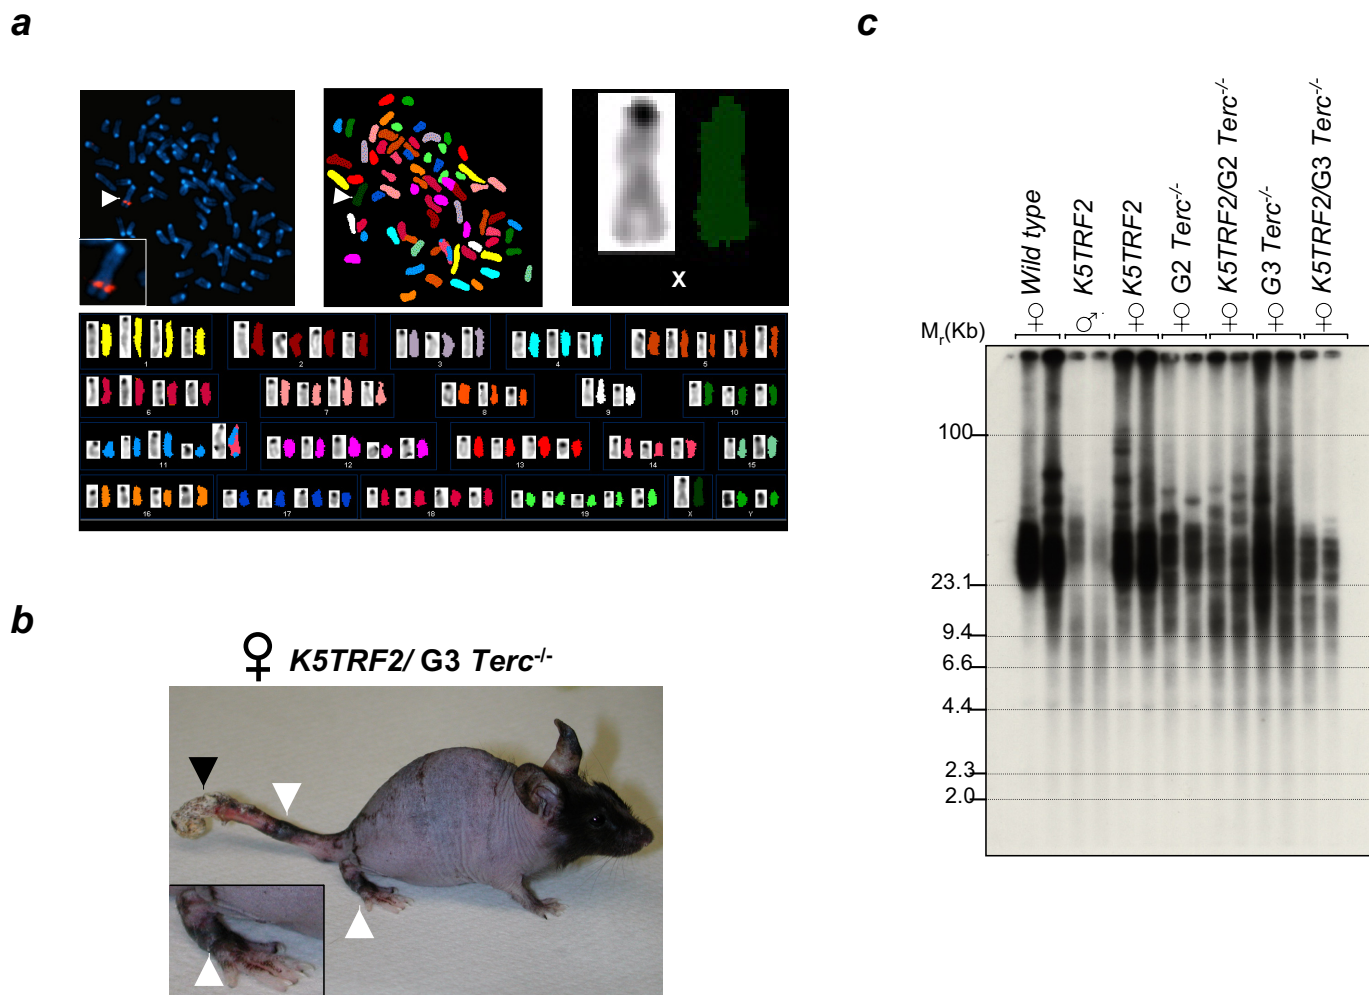

**Fig. S1.** Severe skin phenotypes in female *G3 Terc<sup>-/-</sup>* mice carrying an X-linked *K5TRF2* transgene. (A) SKY DNA FISH analysis combined with TRF2 DNA FISH mapped the integration site of the *K5TRF2* transgene to the X chromosome in male PM *K5TRF2* mice. (B) Female PM *K5TRF2/G3 Terc<sup>-/-</sup>* mice display skin hyperpigmentation (white arrows), hair loss, and severe skin necrosis (black arrows). (C) TRF analysis of experimental mice. Telomere length was determined by TRF analysis using primary keratinocytes prepared from back skin. Terminal telomeric fragments were detected using a telomere-specific <sup>32</sup>P-labeled probe. Telomerase deficiency in female PM *K5TRF2/G1-G3 Terc<sup>-/-</sup>* mice results in an accelerated telomere shortening compared with single-mutant *Terc<sup>-/-</sup>* controls.

**a**

E12 embryos

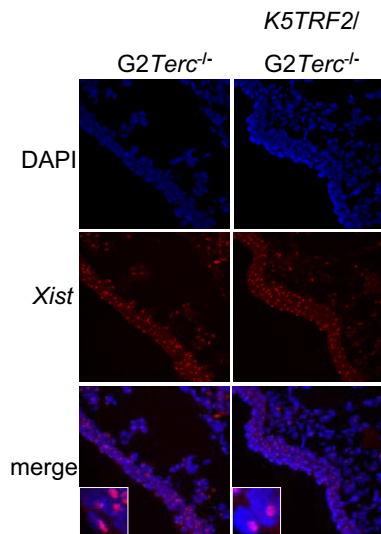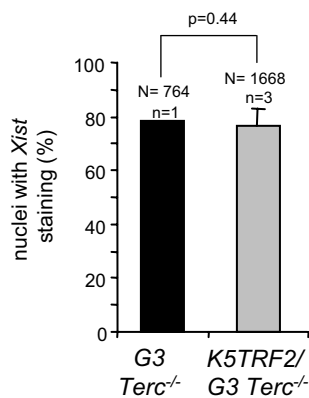**b**

Adult tail skin

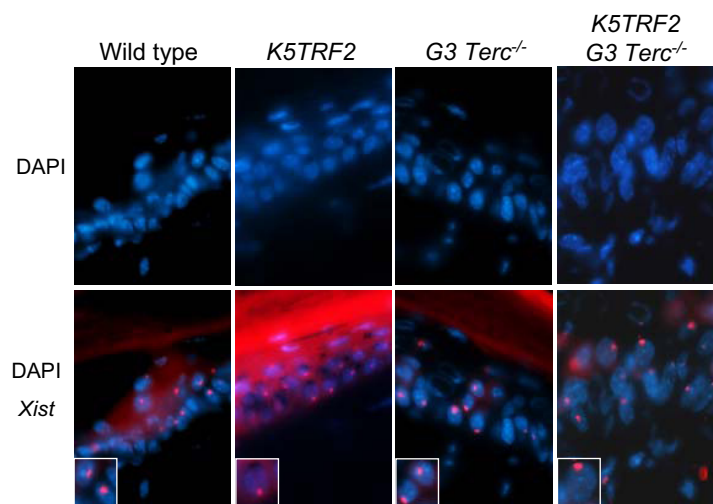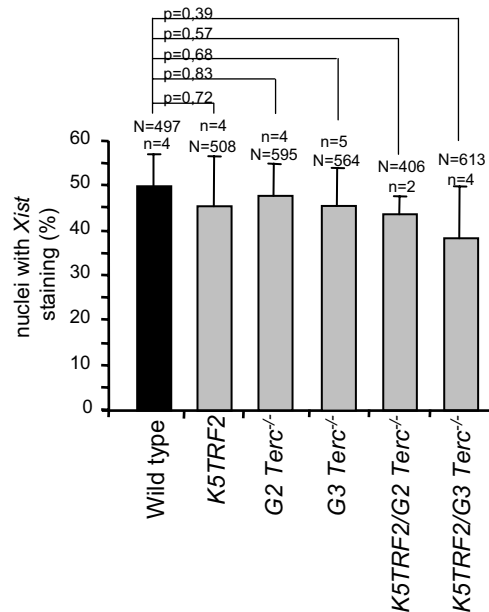

**Fig. S2.** Initiation of X chromosome inactivation and association of *Xist* RNA with chromatin is unaffected by telomere shortening. (A) *Xist* RNA was detected by RNA FISH on frozen tissue sections obtained from day E12 embryos. N, number of nuclei analyzed; n, number of animals; standard error and statistical significance values (Student's *t* test) are shown. (B) *Xist* RNA FISH on adult tail-skin sections. Genomic DNA was labeled using DAPI. (C) Determination of TelRNA/TERRA levels by Northern blotting. pMEFs were exposed to 3 Gy of ionizing radiation; total RNA was prepared at the indicated time points, and TelRNA/TERRA levels were determined by Northern blotting. A probe, specific for the 18S ribosomal subunit, was used as a loading control. Experiment was repeated 4 times. (D) Quantification of Northern blot described in (C). TelRNA/TERRA levels were normalized against the 18S ribosomal subunit. Ionizing radiation does not have a significant influence on telomeric transcription in the experimental time-window. n, number of experiments carried out; error bars indicate standard error. An unpaired Student's *t* test was used to calculate statistical significance. (E) Quantification of TelRNA foci in nuclei of female pMEFs after  $\gamma$  irradiation (see Fig. S3B). Ionizing radiation slightly increases the number of TelRNA foci per nucleus 3 h postirradiation. (F) Quantification of Tac frequency in irradiated pMEFs (see Fig. S3B). Ionizing radiation slightly decreases the number of TelRNA foci per nucleus 3 h postirradiation. (G) Determination of area of TelRNA signals in experimental cells.  $\gamma$  irradiation does not significantly affect areas of TelRNA stainings indicating that ionizing radiation does not affect TelRNA levels in the tested time interval. In Fig. S2 E–G, N denotes the number of mice, and n the total number of nuclei analyzed. Error bars indicate standard error. An unpaired Student's *t* test was used to calculate statistical significance. Note: in (G), n refers to the total number of TelRNA signals analyzed.





**a**

|                                                                               | K5TRF2 vs.<br>Wild type | G2 <i>Terc</i> <sup>-/-</sup> vs.<br>Wild type | K5TRF2/G2 <i>Terc</i> <sup>-/-</sup> vs.<br>Wild type | K5TRF2/G3 <i>Terc</i> <sup>-/-</sup> vs.<br>Wild type | K5TRF2/G3 <i>Terc</i> <sup>-/-</sup> vs.<br>K5TRF2/G2 <i>Terc</i> <sup>-/-</sup> | K5TRF2/G3 <i>Terc</i> <sup>-/-</sup> vs.<br>G2 <i>Terc</i> <sup>-/-</sup> |
|-------------------------------------------------------------------------------|-------------------------|------------------------------------------------|-------------------------------------------------------|-------------------------------------------------------|----------------------------------------------------------------------------------|---------------------------------------------------------------------------|
| K5TRF2 vs. Wild type                                                          |                         | 0,16                                           | 0,11                                                  | 1,87E-06                                              | 1,90E-04                                                                         | 7,19E-06                                                                  |
| G2 <i>Terc</i> <sup>-/-</sup> vs. Wild type                                   | 0,16                    |                                                | 0,83                                                  | 1,67E-04                                              | 8,29E-03                                                                         | 5,27E-04                                                                  |
| K5TRF2/G2 <i>Terc</i> <sup>-/-</sup> vs. Wild type                            | 0,11                    | 0,83                                           |                                                       | 3,25E-04                                              | 6,87E-04                                                                         | 9,84E-04                                                                  |
| K5TRF2/G3 <i>Terc</i> <sup>-/-</sup> vs. Wild type                            | 1,87E-06                | 1,67E-04                                       | 3,25E-04                                              |                                                       | 0,23                                                                             | 0,76                                                                      |
| K5TRF2/G3 <i>Terc</i> <sup>-/-</sup> vs. K5TRF2/G2 <i>Terc</i> <sup>-/-</sup> | 1,90E-04                | 8,29E-03                                       | 6,87E-04                                              | 0,23                                                  |                                                                                  | 3,79E-02                                                                  |
| K5TRF2/G3 <i>Terc</i> <sup>-/-</sup> vs. G2 <i>Terc</i> <sup>-/-</sup>        | 7,19E-06                | 5,27E-04                                       | 9,84E-04                                              | 0,76                                                  | 3,79E-02                                                                         |                                                                           |

**b**

| FDR     | K5TRF2 vs.<br>Wild type<br>female |     |      | G2 <i>Terc</i> <sup>-/-</sup> vs.<br>Wild type<br>female |      |      | K5TRF2/G2 <i>Terc</i> <sup>-/-</sup> vs.<br>Wild type<br>female |      |      | K5TRF2/G3 <i>Terc</i> <sup>-/-</sup> vs.<br>Wild type<br>female |      |      | K5TRF2/G3 <i>Terc</i> <sup>-/-</sup> vs.<br>K5TRF2/G2 <i>Terc</i> <sup>-/-</sup><br>female |      |      | K5TRF2/G3 <i>Terc</i> <sup>-/-</sup> vs.<br>G2 <i>Terc</i> <sup>-/-</sup><br>female |      |      | K5TRF2 vs.<br>Wild type<br>male |    |      |
|---------|-----------------------------------|-----|------|----------------------------------------------------------|------|------|-----------------------------------------------------------------|------|------|-----------------------------------------------------------------|------|------|--------------------------------------------------------------------------------------------|------|------|-------------------------------------------------------------------------------------|------|------|---------------------------------|----|------|
|         | total                             | up  | down | total                                                    | up   | down | total                                                           | up   | down | total                                                           | up   | down | total                                                                                      | up   | down | total                                                                               | up   | down | total                           | up | down |
| < 0.05  | 0                                 | 213 | 183  | 20                                                       | 1181 | 679  | 502                                                             | 2757 | 1247 | 1510                                                            | 1941 | 718  | 1223                                                                                       | 2191 | 860  | 1331                                                                                | 2112 | 890  | 1222                            |    |      |
| < 0.01  | 0                                 | 0   | 0    | 0                                                        | 50   | 39   | 11                                                              | 2291 | 981  | 1310                                                            | 1236 | 417  | 819                                                                                        | 1477 | 575  | 902                                                                                 | 969  | 364  | 605                             |    |      |
| < 0.001 | 0                                 | 0   | 0    | 0                                                        | 0    | 0    | 0                                                               | 1455 | 571  | 884                                                             | 610  | 184  | 426                                                                                        | 741  | 261  | 480                                                                                 | 102  | 27   | 75                              |    |      |

**Fig. S4.** Deregulation of the mouse transcriptome is linked to progressive telomere shortening. (A) Tabular representation of statistical significance values for global transcriptome changes between the indicated pairwise microarray comparisons. Red and yellow, highly significant global gene expression changes. Red, expression changes in *K5TRF2/G3 Terc*<sup>-/-</sup> cells are highly significant in all comparisons with wild-type cells. A Welch 2-sample *t* test was used to calculate statistical significance. (B) Tabular representation of number of genes displaying significant altered transcript levels in pairwise comparisons. Up, up-regulated; down, down-regulated; FDR, false detection rate. An FDR < 0.05 is regarded as statistically significant.

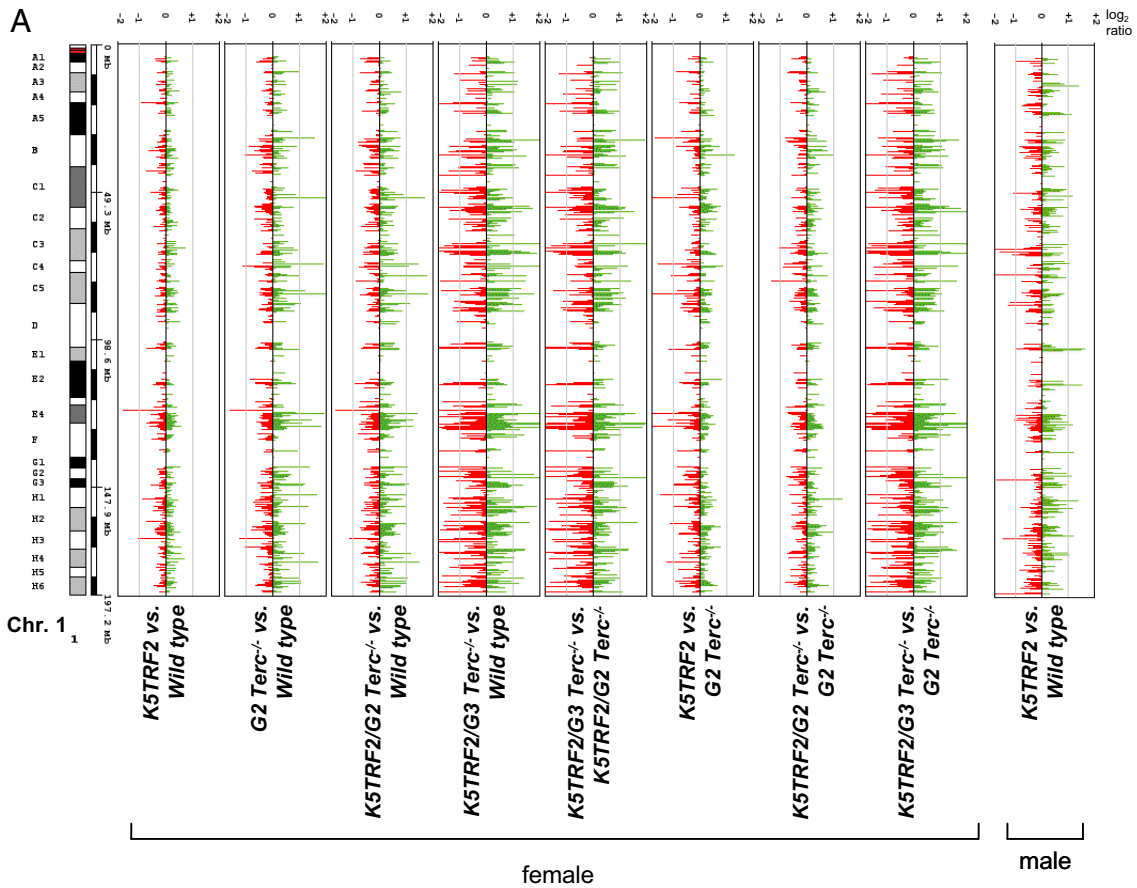

**Fig. S5.** (A–J) Comparative transcriptome analyses. Total RNA was prepared from tail keratinocytes derived from female PM wild-type ( $n = 4$ ), *K5TRF2* ( $n = 4$ ), *G2 Terc*<sup>-/-</sup> ( $n = 2$ ), *K5TRF2/G2 Terc*<sup>-/-</sup>, ( $n = 3$ ), and *K5TRF2/G3 Terc*<sup>-/-</sup> ( $n = 3$ ) mice, as well as from male wild-type ( $n = 4$ ) and PM *K5TRF2* transgenic ( $n = 4$ ) mice. RNA was one-color labeled and hybridized to Agilent  $4 \times 44K$  mouse genomic arrays. Intensity ratios of corresponding gene probes were calculated and blotted along the chromosomal maps of all mouse chromosomes. Critical telomere shortening in keratinocytes from *K5TRF2/G3 Terc*<sup>-/-</sup> mice is associated with genome-wide alterations in gene transcription. Transcriptional changes are expressed as ( $\log_2$ ) ratios. Red bars, down-regulated genes; green bars, up-regulated genes.







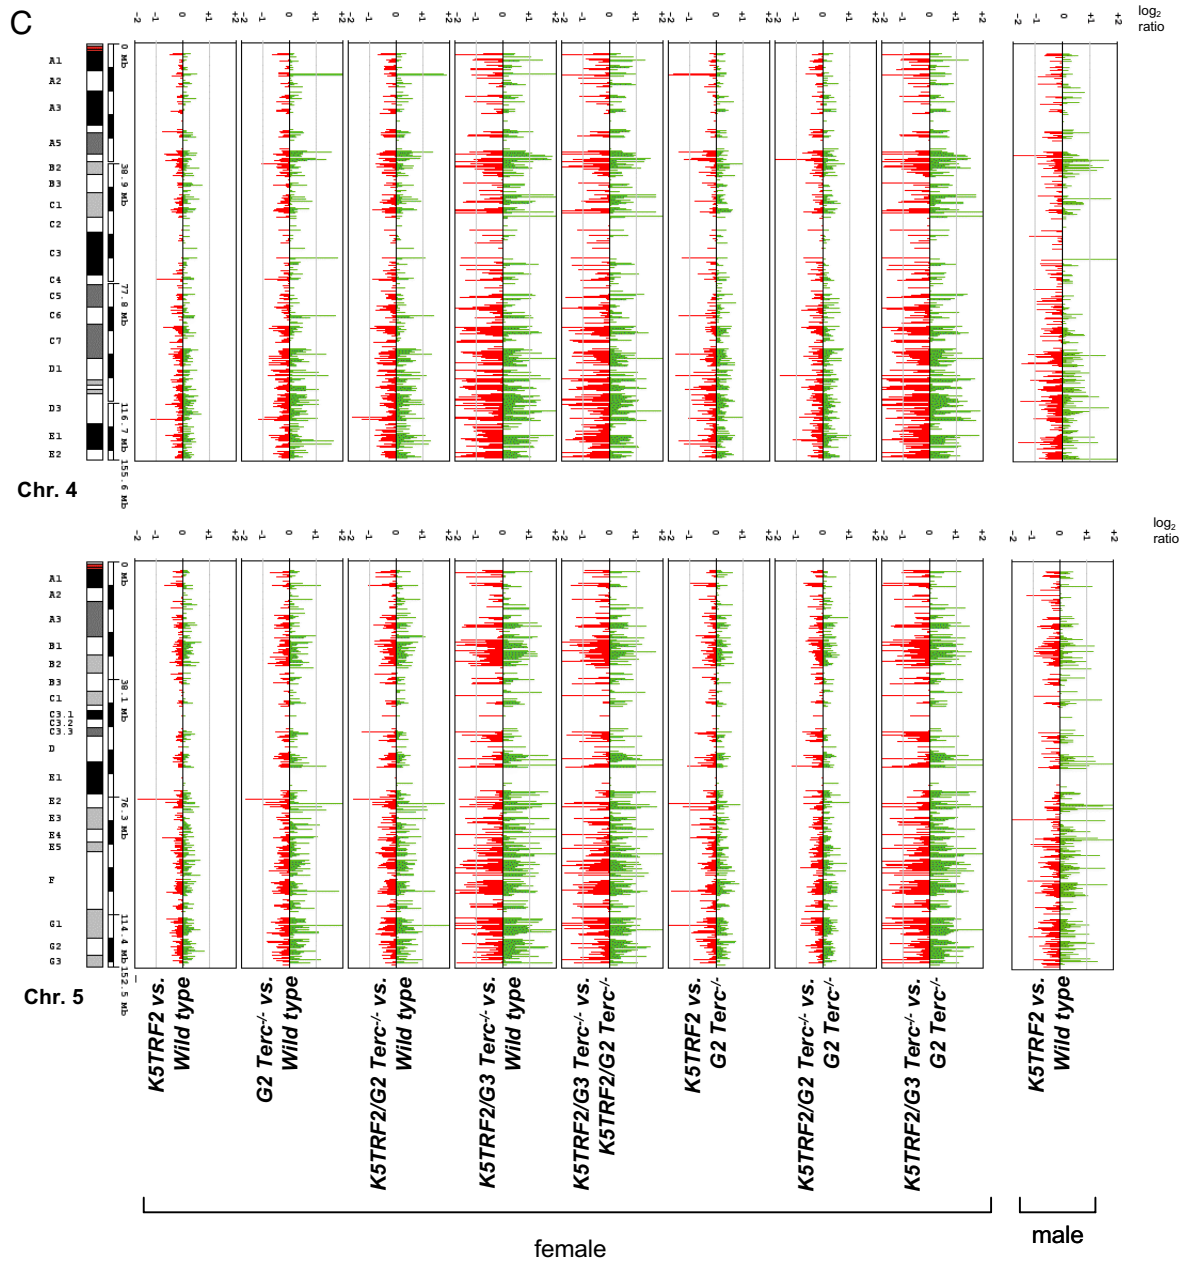

Fig. S5 (continued).







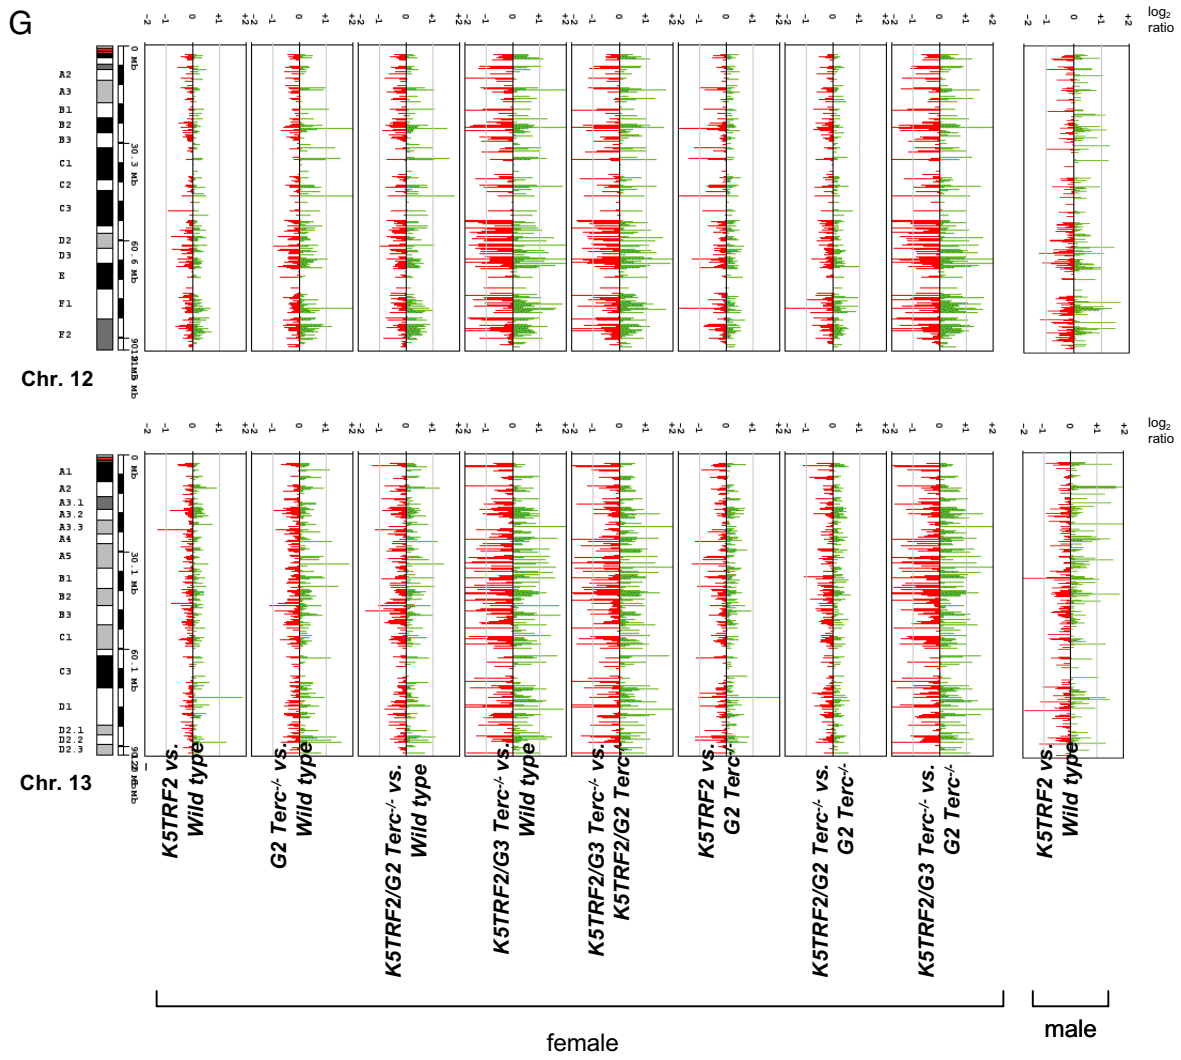

Fig. S5 (continued).



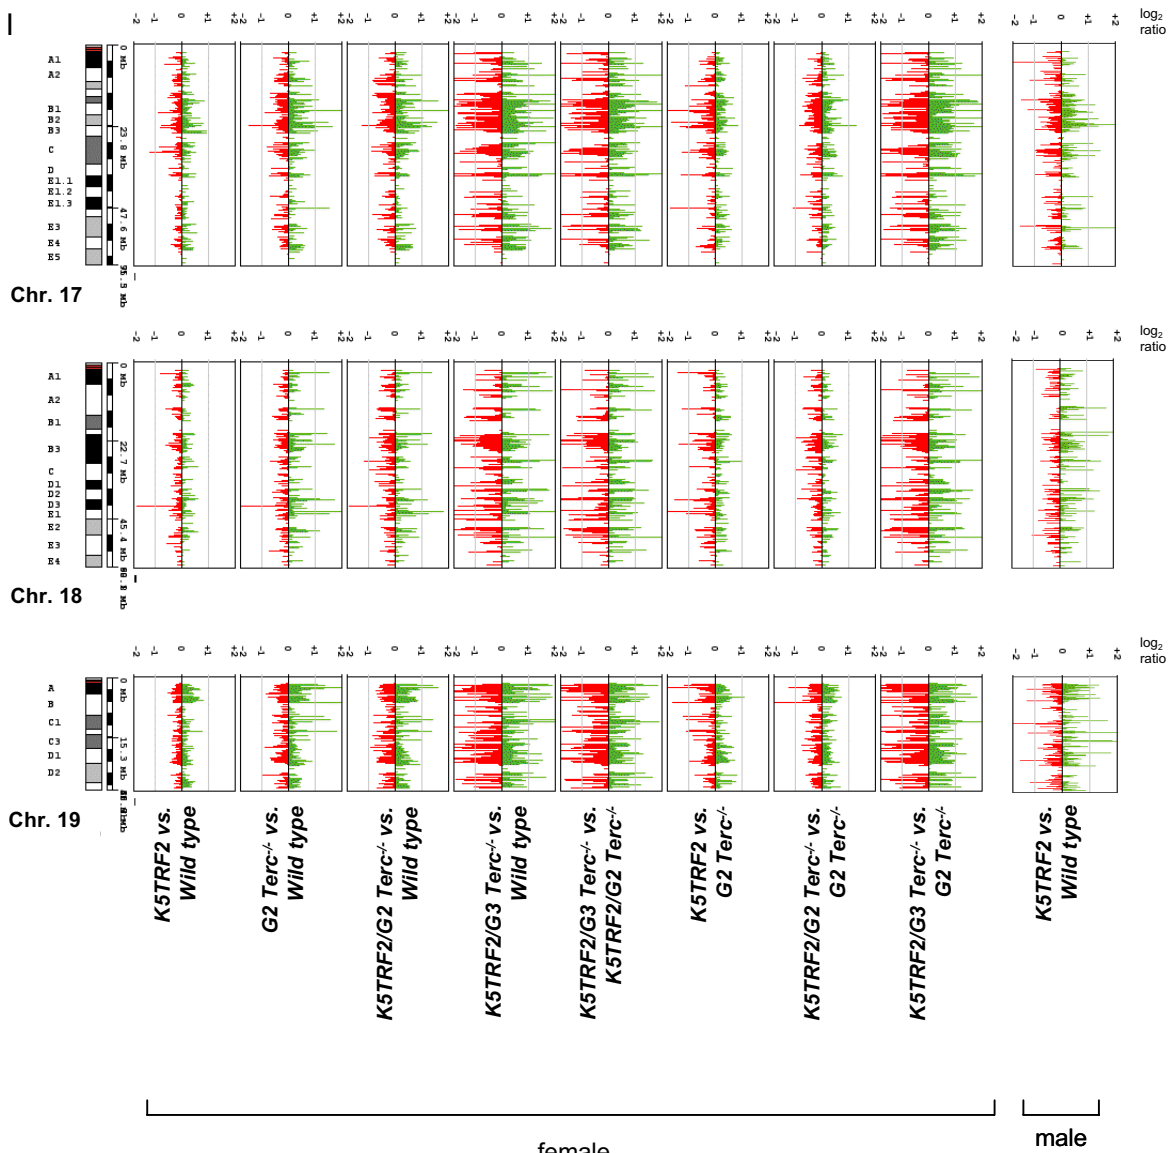

Fig. S5 (continued).



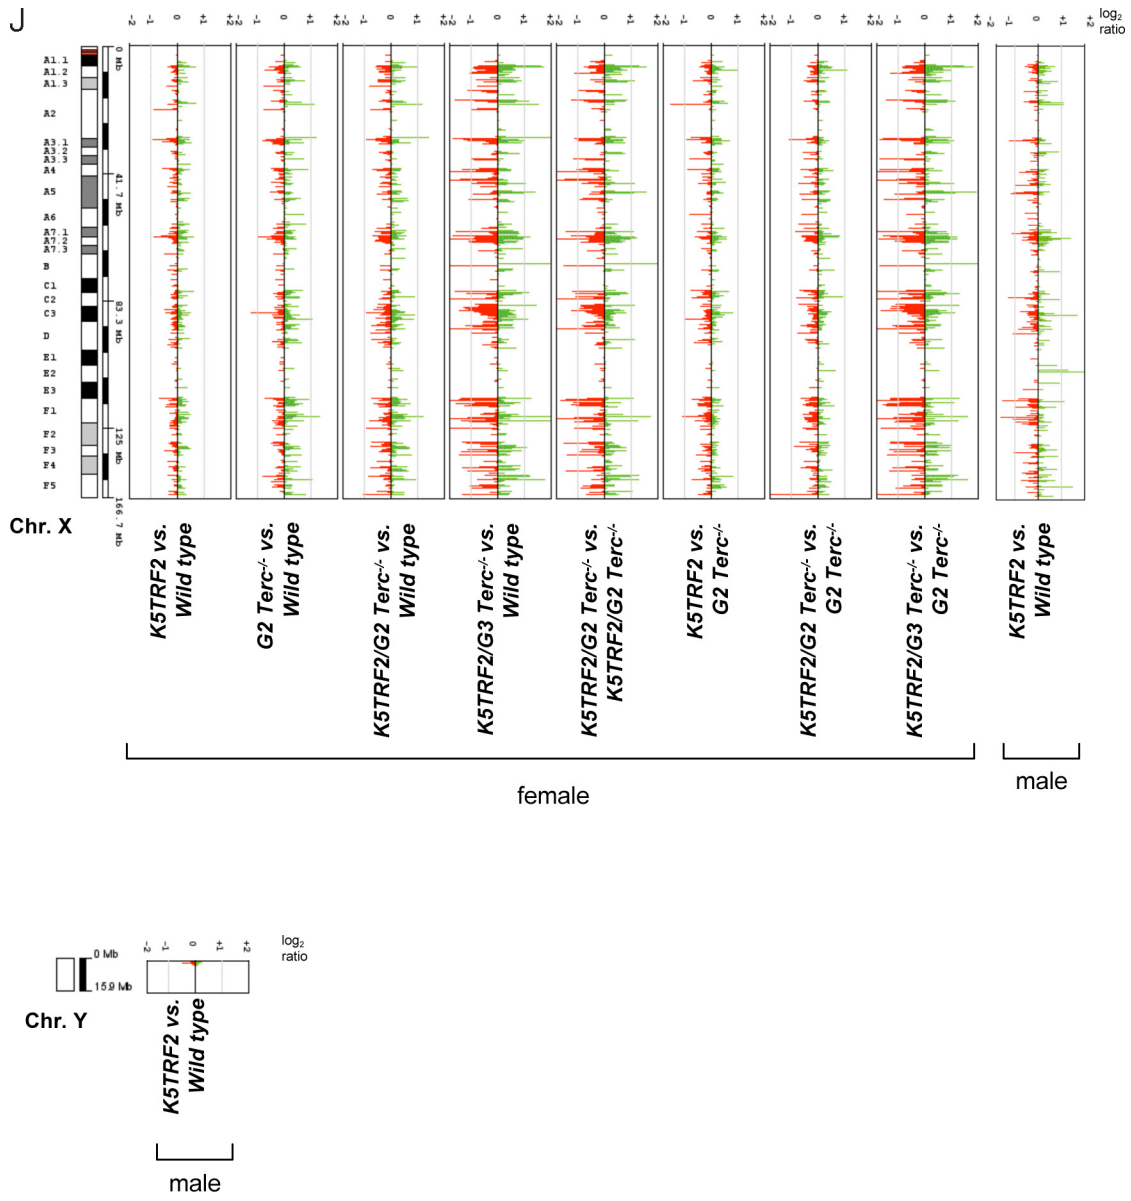

Fig. S5 (continued).



**Table S1. Frequency of altered genes per chromosome**

| Chr.    | <i>K5TRF2</i> vs. |       | <i>G2 Terc<sup>-/-</sup></i> vs. |       | <i>K5TRF2/G2 Terc<sup>-/-</sup></i> vs. |       | <i>K5TRF2/G3 Terc<sup>-/-</sup></i> vs. |       | <i>K5TRF2/G3 Terc<sup>-/-</sup></i> vs. |       | <i>K5TRF2/G3 Terc<sup>-/-</sup></i> vs. |       | <i>Wild type</i> vs. <i>K5TRF2</i>   |       |                              |  |               |  |
|---------|-------------------|-------|----------------------------------|-------|-----------------------------------------|-------|-----------------------------------------|-------|-----------------------------------------|-------|-----------------------------------------|-------|--------------------------------------|-------|------------------------------|--|---------------|--|
|         | Wild type         |       |                                  |       |                                         |       |                                         |       |                                         |       |                                         |       | <i>K5TRF2/ G2 Terc<sup>-/-</sup></i> |       | <i>G2 Terc<sup>-/-</sup></i> |  | <i>K5TRF2</i> |  |
|         | Female            |       |                                  |       |                                         |       | Male                                    |       |                                         |       |                                         |       |                                      |       |                              |  |               |  |
|         | %Up               | %Down | %Up                              | %Down | %Up                                     | %Down | %Up                                     | %Down | %Up                                     | %Down | %Up                                     | %Down | %Up                                  | %Down |                              |  |               |  |
| 1       | 0                 | 0     | 1.7                              | 0.1   | 4.2                                     | 2.6   | 6.9                                     | 10.4  | 3.7                                     | 8.2   | 4.5                                     | 8.2   | 6.4                                  | 10.8  |                              |  |               |  |
| 2       | 0                 | 0     | 1                                | 0.1   | 4.5                                     | 2.8   | 7.4                                     | 6.5   | 3.7                                     | 6     | 4.5                                     | 6.5   | 5.2                                  | 10.5  |                              |  |               |  |
| 3       | 0                 | 0     | 1                                | 0.2   | 5.2                                     | 3.3   | 8                                       | 11    | 5.8                                     | 8.2   | 6.1                                     | 9.6   | 6.4                                  | 15.2  |                              |  |               |  |
| 4       | 0                 | 0     | 1                                | 0.1   | 3.6                                     | 2     | 6.5                                     | 9.6   | 3.3                                     | 7.3   | 4.2                                     | 8.3   | 8.7                                  | 8.2   |                              |  |               |  |
| 5       | 0                 | 0     | 1.4                              | 0     | 3.6                                     | 2.9   | 6                                       | 7.2   | 3.9                                     | 5.8   | 4.3                                     | 6.3   | 7.5                                  | 11.2  |                              |  |               |  |
| 6       | 0                 | 0     | 0.8                              | 0.1   | 3.8                                     | 2.8   | 6.1                                     | 7.1   | 3.8                                     | 6.5   | 5                                       | 6.6   | 5.0                                  | 7.9   |                              |  |               |  |
| 7       | 0                 | 0     | 1.2                              | 0.1   | 3.7                                     | 2.5   | 6                                       | 6.8   | 3.5                                     | 6.2   | 4.3                                     | 6.1   | 4.3                                  | 9.6   |                              |  |               |  |
| 8       | 0                 | 0     | 1                                | 0.7   | 3                                       | 3.3   | 5.9                                     | 10.6  | 4.3                                     | 7.9   | 4.4                                     | 8.5   | 6.0                                  | 9.4   |                              |  |               |  |
| 9       | 0                 | 0     | 1                                | 0.4   | 3.3                                     | 2.1   | 5.3                                     | 7.1   | 3.3                                     | 6.3   | 3.6                                     | 6.5   | 6.8                                  | 9.6   |                              |  |               |  |
| 10      | 0                 | 0     | 1.2                              | 0.2   | 4.1                                     | 2.6   | 7.9                                     | 7.6   | 4                                       | 6.4   | 5.2                                     | 6.7   | 5.1                                  | 11.0  |                              |  |               |  |
| 11      | 0                 | 0     | 0.9                              | 0.1   | 3                                       | 2.5   | 7.4                                     | 8.4   | 3.8                                     | 6.9   | 5.2                                     | 7     | 6.6                                  | 9.1   |                              |  |               |  |
| 12      | 0                 | 0     | 1.6                              | 0.4   | 5.1                                     | 3.1   | 9.5                                     | 10.3  | 5.3                                     | 7.9   | 6.4                                     | 8.8   | 4.6                                  | 10.3  |                              |  |               |  |
| 13      | 0                 | 0     | 0.9                              | 0.1   | 2.5                                     | 3.7   | 5.7                                     | 9.7   | 4                                       | 6.6   | 3.9                                     | 7.6   | 6.1                                  | 10.5  |                              |  |               |  |
| 14      | 0                 | 0     | 0.6                              | 0.3   | 3.2                                     | 2.7   | 6.5                                     | 8.9   | 3.2                                     | 6.4   | 4.6                                     | 7.8   | 7.3                                  | 9.9   |                              |  |               |  |
| 15      | 0                 | 0     | 1.1                              | 0.3   | 4.2                                     | 3.8   | 8.4                                     | 10.5  | 5.3                                     | 8.4   | 5.8                                     | 9.4   | 7.3                                  | 14.4  |                              |  |               |  |
| 16      | 0                 | 0     | 1.1                              | 0.4   | 2.7                                     | 3.3   | 7.8                                     | 8.8   | 4.2                                     | 7.1   | 4.7                                     | 7.7   | 6.0                                  | 11.5  |                              |  |               |  |
| 17      | 0                 | 0     | 0.6                              | 0.1   | 3.1                                     | 2.8   | 5.6                                     | 6.9   | 3.3                                     | 4.6   | 3.9                                     | 6.1   | 6.3                                  | 7.4   |                              |  |               |  |
| 18      | 0                 | 0     | 1.9                              | 0     | 4.3                                     | 2.9   | 7.4                                     | 7.2   | 5                                       | 6.9   | 4.5                                     | 7.9   | 3.6                                  | 18.2  |                              |  |               |  |
| 19      | 0                 | 0     | 0.6                              | 0.2   | 3.7                                     | 2.6   | 5.6                                     | 6.9   | 2.7                                     | 6.2   | 2.9                                     | 7.2   | 5.1                                  | 10.4  |                              |  |               |  |
| X       | 0                 | 0     | 0.3                              | 0     | 2.3                                     | 2.4   | 4.5                                     | 6.6   | 2.6                                     | 5.1   | 2.7                                     | 6.5   | 6.2                                  | 6.3   |                              |  |               |  |
| Average | 0                 | 0     | 1.1                              | 0.2   | 3.7                                     | 2.8   | 6.7                                     | 8.4   | 3.9                                     | 6.8   | 4.5                                     | 7.5   | 6.0                                  | 10.6  |                              |  |               |  |

Percentage of significantly altered probe sets (FDR < 0.05) per individual chromosome in the indicated transcriptome comparisons. Percentage increases with progressive telomere shortening. Changes on autosomes and the X chromosome accumulate in a similar way. %Up, percentage of up-regulated genes; %Down, percentage of down-regulated genes. Average frequency per chromosome is indicated.

**Table S2. Top 50 upregulated genes in *K5TRF2/G3 Terc*<sup>-/-</sup> versus wild-type transcriptome comparisons**

| Gene symbol   | <i>K5TRF2/G3 Terc</i> <sup>-/-</sup> vs.<br>Wild type |          | <i>K5TRF2/G3 Terc</i> <sup>-/-</sup> vs.<br><i>G2 Terc</i> <sup>-/-</sup> |          | <i>K5TRF2/G3 Terc</i> <sup>-/-</sup> vs.<br><i>K5TRF2/G2 Terc</i> <sup>-/-</sup> |          | <i>K5TRF2/G2 Terc</i> <sup>-/-</sup> vs.<br>Wild type |          |
|---------------|-------------------------------------------------------|----------|---------------------------------------------------------------------------|----------|----------------------------------------------------------------------------------|----------|-------------------------------------------------------|----------|
|               | logFC                                                 | FDR      | logFC                                                                     | FDR      | logFC                                                                            | FDR      | logFC                                                 | FDR      |
| Fkbp5         | 3.34                                                  | 3.18E-09 | 2.78                                                                      | 3.81E-07 | 2.98                                                                             | 5.26E-08 | 0.36                                                  | 1.29E-01 |
| Fkbp5         | 4.04                                                  | 3.18E-09 | 3.40                                                                      | 3.81E-07 | 4.03                                                                             | 2.94E-08 | 0.01                                                  | 9.64E-01 |
| Slc38a2       | 2.77                                                  | 9.38E-09 | 1.73                                                                      | 1.06E-05 | 1.46                                                                             | 1.70E-05 | 1.30                                                  | 3.89E-03 |
| 2310002A05Rik | 6.52                                                  | 1.08E-08 | 5.10                                                                      | 1.88E-06 | 4.34                                                                             | 2.53E-06 | 2.17                                                  | 7.90E-03 |
| 5430432H19Rik | 3.02                                                  | 1.90E-08 | 2.47                                                                      | 1.88E-06 | 2.27                                                                             | 1.28E-06 | 0.76                                                  | 1.97E-02 |
| 9630055N22Rik | 2.79                                                  | 1.90E-08 | 2.08                                                                      | 4.10E-06 | 1.84                                                                             | 4.50E-06 | 0.95                                                  | 9.13E-03 |
| Gpsm1         | 2.83                                                  | 2.51E-08 | 2.44                                                                      | 1.88E-06 | 1.82                                                                             | 9.61E-06 | 1.01                                                  | 9.13E-03 |
| 2810003C17Rik | 4.29                                                  | 2.51E-08 | 3.82                                                                      | 1.57E-06 | 3.33                                                                             | 1.46E-06 | 0.96                                                  | 3.14E-02 |
| Ifngr1        | 2.84                                                  | 2.51E-08 | 2.31                                                                      | 3.21E-06 | 2.54                                                                             | 5.28E-07 | 0.29                                                  | 2.45E-01 |
| NA            | 3.96                                                  | 3.10E-08 | 3.75                                                                      | 1.39E-06 | 3.39                                                                             | 8.67E-07 | 0.57                                                  | 1.24E-01 |
| 2810457I06Rik | 3.04                                                  | 3.45E-08 | 2.96                                                                      | 1.39E-06 | 2.74                                                                             | 6.07E-07 | 0.30                                                  | 2.84E-01 |
| NA            | 2.59                                                  | 4.14E-08 | 1.80                                                                      | 1.95E-05 | 1.70                                                                             | 1.21E-05 | 0.89                                                  | 1.14E-02 |
| BC011467      | 4.10                                                  | 4.16E-08 | 4.06                                                                      | 1.39E-06 | 3.55                                                                             | 9.39E-07 | 0.56                                                  | 1.56E-01 |
| Ln timer      | 2.67                                                  | 4.55E-08 | 2.27                                                                      | 3.96E-06 | 2.34                                                                             | 9.39E-07 | 0.33                                                  | 2.05E-01 |
| App           | 3.32                                                  | 4.55E-08 | 2.21                                                                      | 3.41E-05 | 2.11                                                                             | 1.97E-05 | 1.21                                                  | 1.08E-02 |
| Slc6a6        | 3.29                                                  | 4.55E-08 | 2.29                                                                      | 2.24E-05 | 2.62                                                                             | 2.53E-06 | 0.67                                                  | 5.23E-02 |
| Fkbp5         | 4.91                                                  | 6.74E-08 | 2.72                                                                      | 1.97E-04 | 2.67                                                                             | 9.98E-05 | 2.24                                                  | 6.00E-03 |
| Blcap         | 2.75                                                  | 8.88E-08 | 2.20                                                                      | 1.16E-05 | 1.85                                                                             | 1.97E-05 | 0.90                                                  | 1.76E-02 |
| Sdcbp2        | 3.12                                                  | 8.91E-08 | 2.51                                                                      | 1.13E-05 | 2.38                                                                             | 7.24E-06 | 0.74                                                  | 3.89E-02 |
| Ln timer      | 2.67                                                  | 9.20E-08 | 2.24                                                                      | 8.18E-06 | 2.31                                                                             | 2.15E-06 | 0.36                                                  | 1.88E-01 |
| Ctdsp2        | 2.38                                                  | 1.02E-07 | 1.88                                                                      | 1.50E-05 | 1.54                                                                             | 3.38E-05 | 0.84                                                  | 1.43E-02 |
| NA            | 2.78                                                  | 1.33E-07 | 2.37                                                                      | 9.41E-06 | 2.11                                                                             | 9.83E-06 | 0.67                                                  | 4.15E-02 |
| Wdfy1         | 2.33                                                  | 1.35E-07 | 1.63                                                                      | 4.98E-05 | 1.26                                                                             | 1.80E-04 | 1.06                                                  | 7.32E-03 |
| Klhl24        | 2.08                                                  | 1.49E-07 | 1.84                                                                      | 7.36E-06 | 1.37                                                                             | 3.87E-05 | 0.71                                                  | 1.76E-02 |
| Tnnt2         | 2.60                                                  | 1.49E-07 | 2.38                                                                      | 5.41E-06 | 1.83                                                                             | 2.08E-05 | 0.77                                                  | 2.46E-02 |
| Shd           | 2.81                                                  | 1.53E-07 | 3.13                                                                      | 1.39E-06 | 2.64                                                                             | 1.46E-06 | 0.17                                                  | 5.79E-01 |
| Ctdsp2        | 2.42                                                  | 1.68E-07 | 2.29                                                                      | 4.30E-06 | 1.91                                                                             | 9.44E-06 | 0.52                                                  | 6.42E-02 |
| Cecr2         | 3.39                                                  | 1.73E-07 | 2.40                                                                      | 5.51E-05 | 2.42                                                                             | 2.06E-05 | 0.97                                                  | 2.76E-02 |
| 1810015C04Rik | 2.39                                                  | 1.74E-07 | 2.02                                                                      | 1.28E-05 | 2.07                                                                             | 3.75E-06 | 0.32                                                  | 2.17E-01 |
| Cpa4          | 4.15                                                  | 1.89E-07 | 3.32                                                                      | 2.20E-05 | 3.04                                                                             | 1.90E-05 | 1.11                                                  | 3.47E-02 |
| NA            | 2.21                                                  | 1.89E-07 | 2.48                                                                      | 1.47E-06 | 1.91                                                                             | 3.93E-06 | 0.30                                                  | 2.24E-01 |
| Tead4         | 2.50                                                  | 2.05E-07 | 1.85                                                                      | 4.55E-05 | 1.62                                                                             | 5.70E-05 | 0.88                                                  | 1.76E-02 |
| Ramp3         | 2.40                                                  | 2.38E-07 | 2.14                                                                      | 1.12E-05 | 1.71                                                                             | 2.84E-05 | 0.69                                                  | 3.04E-02 |
| 4933429H19Rik | 2.15                                                  | 2.86E-07 | 2.17                                                                      | 4.01E-06 | 1.63                                                                             | 1.97E-05 | 0.52                                                  | 5.18E-02 |
| Nfe2l2        | 3.06                                                  | 2.91E-07 | 3.15                                                                      | 3.74E-06 | 2.91                                                                             | 2.53E-06 | 0.15                                                  | 6.86E-01 |
| Lypd5         | 2.10                                                  | 3.06E-07 | 1.89                                                                      | 1.28E-05 | 1.77                                                                             | 9.31E-06 | 0.33                                                  | 1.73E-01 |
| Sprrl1        | 5.12                                                  | 3.08E-07 | 3.73                                                                      | 7.55E-05 | 3.37                                                                             | 7.60E-05 | 1.75                                                  | 1.97E-02 |
| 2310033K02Rik | 2.71                                                  | 3.17E-07 | 2.69                                                                      | 5.26E-06 | 2.23                                                                             | 1.11E-05 | 0.49                                                  | 1.31E-01 |
| Otud7a        | 2.88                                                  | 3.19E-07 | 3.47                                                                      | 1.39E-06 | 3.05                                                                             | 9.43E-07 | -0.17                                                 | 6.18E-01 |
| Lonrf3        | 2.21                                                  | 3.62E-07 | 1.02                                                                      | 2.83E-03 | 0.81                                                                             | 7.31E-03 | 1.40                                                  | 4.17E-03 |
| Plcx1         | 2.86                                                  | 3.70E-07 | 2.15                                                                      | 6.73E-05 | 2.14                                                                             | 2.77E-05 | 0.71                                                  | 5.31E-02 |
| Flg2          | 3.81                                                  | 4.33E-07 | 2.80                                                                      | 9.43E-05 | 2.74                                                                             | 4.80E-05 | 1.08                                                  | 3.73E-02 |
| NA            | 2.56                                                  | 4.42E-07 | 1.97                                                                      | 6.16E-05 | 1.84                                                                             | 4.80E-05 | 0.72                                                  | 3.78E-02 |
| NA            | 3.47                                                  | 4.62E-07 | 3.00                                                                      | 2.47E-05 | 2.58                                                                             | 3.70E-05 | 0.89                                                  | 5.23E-02 |
| Sprrl1        | 5.19                                                  | 4.97E-07 | 3.67                                                                      | 1.48E-04 | 3.21                                                                             | 1.82E-04 | 1.97                                                  | 1.76E-02 |
| Ablim3        | 2.06                                                  | 5.18E-07 | 1.72                                                                      | 3.63E-05 | 1.36                                                                             | 1.10E-04 | 0.70                                                  | 2.39E-02 |
| Sigirr        | 2.36                                                  | 5.23E-07 | 2.28                                                                      | 1.11E-05 | 1.75                                                                             | 4.15E-05 | 0.60                                                  | 5.48E-02 |
| 1700080G18Rik | 1.94                                                  | 6.32E-07 | 2.12                                                                      | 4.01E-06 | 1.65                                                                             | 1.49E-05 | 0.29                                                  | 2.34E-01 |
| Baalc         | 2.50                                                  | 6.75E-07 | 2.77                                                                      | 4.00E-06 | 2.67                                                                             | 1.81E-06 | -0.17                                                 | 5.88E-01 |
| Tfdp2         | 2.08                                                  | 7.13E-07 | 1.97                                                                      | 1.60E-05 | 1.46                                                                             | 9.20E-05 | 0.62                                                  | 3.70E-02 |

Probe sets with most robust up-regulation obtained by *K5TRF2/G3 Terc*<sup>-/-</sup> versus wild-type comparisons were ranked based on the false detection rate (FDR). *K5TRF2/G3 Terc*<sup>-/-</sup> probe sets show persistent up-regulation when compared to *K5TRF2/G2 Terc*<sup>-/-</sup>, and *G2 Terc*<sup>-/-</sup> keratinocytes. Genes up-regulated in *K5TRF2/G3 Terc*<sup>-/-</sup> versus wild-type comparisons are also found to be up-regulated in *K5TRF2/G2 Terc*<sup>-/-</sup> versus wild-type comparisons, albeit in some cases at a FDR > 1.00E-1. Also see Figure 5B.

Table S3. Top 50 downregulated genes in *K5TRF2/G3 Terc<sup>-/-</sup>* versus wild-type transcriptome comparisons

| Gene symbol   | <i>K5TRF2/G3 Terc<sup>-/-</sup></i> vs.<br>Wild type |          | <i>K5TRF2/G3 Terc<sup>-/-</sup></i> vs.<br><i>G2 Terc<sup>-/-</sup></i> |          | <i>K5TRF2/G3 Terc<sup>-/-</sup></i> vs.<br><i>K5TRF2/G2 Terc<sup>-/-</sup></i> |          | <i>K5TRF2/G2 Terc<sup>-/-</sup></i> vs.<br>Wild type |          |
|---------------|------------------------------------------------------|----------|-------------------------------------------------------------------------|----------|--------------------------------------------------------------------------------|----------|------------------------------------------------------|----------|
|               | logFC                                                | FDR      | logFC                                                                   | FDR      | logFC                                                                          | FDR      | logFC                                                | FDR      |
| Slc27a3       | -3.38                                                | 3.18E-09 | -3.43                                                                   | 6.01E-08 | -3.00                                                                          | 4.43E-08 | -0.38                                                | 1.02E-01 |
| Tnc           | -4.15                                                | 6.17E-09 | -4.15                                                                   | 2.08E-07 | -3.76                                                                          | 8.56E-08 | -0.39                                                | 2.05E-01 |
| Scd2          | -2.92                                                | 6.29E-09 | -2.24                                                                   | 1.57E-06 | -2.22                                                                          | 5.28E-07 | -0.70                                                | 1.76E-02 |
| Aldh18a1      | -3.15                                                | 1.08E-08 | -3.07                                                                   | 3.81E-07 | -2.36                                                                          | 8.67E-07 | -0.79                                                | 1.76E-02 |
| Fcgr3         | -3.16                                                | 1.99E-08 | -2.65                                                                   | 1.88E-06 | -2.77                                                                          | 4.94E-07 | -0.39                                                | 1.54E-01 |
| 4732466D17Rik | -2.70                                                | 1.99E-08 | -2.70                                                                   | 4.43E-07 | -2.16                                                                          | 8.86E-07 | -0.54                                                | 3.97E-02 |
| Parp1         | -2.40                                                | 1.99E-08 | -2.45                                                                   | 3.81E-07 | -1.81                                                                          | 1.46E-06 | -0.59                                                | 2.20E-02 |
| Edg8          | -2.85                                                | 2.51E-08 | -2.45                                                                   | 1.93E-06 | -2.38                                                                          | 8.67E-07 | -0.47                                                | 7.99E-02 |
| 1810011O10Rik | -2.99                                                | 2.67E-08 | -2.71                                                                   | 1.57E-06 | -2.67                                                                          | 5.35E-07 | -0.33                                                | 2.27E-01 |
| Fstl1         | -3.09                                                | 2.67E-08 | -2.62                                                                   | 2.44E-06 | -2.62                                                                          | 8.67E-07 | -0.47                                                | 1.02E-01 |
| Npl           | -3.35                                                | 3.34E-08 | -3.92                                                                   | 3.16E-07 | -3.16                                                                          | 4.94E-07 | -0.18                                                | 5.58E-01 |
| 2810055F11Rik | -3.15                                                | 4.16E-08 | -2.95                                                                   | 1.66E-06 | -2.63                                                                          | 1.33E-06 | -0.52                                                | 9.13E-02 |
| Rerg          | -2.97                                                | 4.27E-08 | -2.59                                                                   | 3.12E-06 | -2.46                                                                          | 1.46E-06 | -0.51                                                | 8.37E-02 |
| Slc16a9       | -3.26                                                | 4.55E-08 | -3.16                                                                   | 1.57E-06 | -2.77                                                                          | 1.31E-06 | -0.49                                                | 1.26E-01 |
| BC029169      | -2.71                                                | 6.86E-08 | -2.41                                                                   | 3.84E-06 | -2.49                                                                          | 8.86E-07 | -0.22                                                | 4.04E-01 |
| Galnt14       | -2.59                                                | 7.64E-08 | -2.06                                                                   | 1.13E-05 | -1.77                                                                          | 1.63E-05 | -0.83                                                | 1.76E-02 |
| S100a4        | -2.28                                                | 7.64E-08 | -1.98                                                                   | 4.77E-06 | -2.35                                                                          | 4.94E-07 | 0.07                                                 | 7.76E-01 |
| A730090H04Rik | -2.47                                                | 8.51E-08 | -2.26                                                                   | 3.53E-06 | -1.66                                                                          | 1.91E-05 | -0.81                                                | 1.76E-02 |
| Dmpk          | -2.83                                                | 8.76E-08 | -2.64                                                                   | 3.14E-06 | -2.47                                                                          | 1.70E-06 | -0.36                                                | 2.15E-01 |
| Pla2 g4f      | -2.82                                                | 8.89E-08 | -2.14                                                                   | 1.87E-05 | -2.13                                                                          | 8.05E-06 | -0.69                                                | 3.54E-02 |
| Fndc1         | -3.30                                                | 9.19E-08 | -3.26                                                                   | 1.93E-06 | -3.70                                                                          | 2.98E-07 | 0.40                                                 | 2.40E-01 |
| Ccdc80        | -3.15                                                | 1.05E-07 | -2.89                                                                   | 4.01E-06 | -2.57                                                                          | 4.03E-06 | -0.58                                                | 9.10E-02 |
| Eppb9         | -2.89                                                | 1.35E-07 | -2.89                                                                   | 2.43E-06 | -2.89                                                                          | 8.67E-07 | 0.00                                                 | 9.93E-01 |
| Sulf2         | -2.13                                                | 1.86E-07 | -1.80                                                                   | 1.32E-05 | -1.50                                                                          | 2.46E-05 | -0.63                                                | 2.58E-02 |
| Fmo5          | -2.35                                                | 2.05E-07 | -2.00                                                                   | 1.34E-05 | -1.77                                                                          | 1.63E-05 | -0.58                                                | 4.38E-02 |
| Ptn           | -2.32                                                | 2.15E-07 | -3.11                                                                   | 3.81E-07 | -2.84                                                                          | 2.98E-07 | 0.52                                                 | 6.11E-02 |
| Pdlim3        | -3.19                                                | 2.36E-07 | -3.58                                                                   | 1.57E-06 | -3.29                                                                          | 9.28E-07 | 0.10                                                 | 7.97E-01 |
| Hoxd4         | -3.41                                                | 2.38E-07 | -2.68                                                                   | 3.16E-05 | -2.54                                                                          | 1.93E-05 | -0.87                                                | 4.15E-02 |
| Igfbp5        | -3.03                                                | 2.38E-07 | -3.79                                                                   | 7.25E-07 | -3.48                                                                          | 4.94E-07 | 0.45                                                 | 1.84E-01 |
| Myom2         | -4.41                                                | 2.42E-07 | -3.82                                                                   | 1.40E-05 | -4.18                                                                          | 2.15E-06 | -0.23                                                | 6.59E-01 |
| Col4a5        | -2.72                                                | 2.45E-07 | -2.99                                                                   | 1.88E-06 | -2.49                                                                          | 3.02E-06 | -0.23                                                | 4.56E-01 |
| 2210016F16Rik | -2.33                                                | 2.64E-07 | -2.18                                                                   | 7.82E-06 | -1.84                                                                          | 1.32E-05 | -0.49                                                | 7.71E-02 |
| Ankrd23       | -2.78                                                | 2.81E-07 | -2.50                                                                   | 1.16E-05 | -2.14                                                                          | 1.73E-05 | -0.64                                                | 5.94E-02 |
| Rdhe2         | -2.74                                                | 2.81E-07 | -2.70                                                                   | 4.82E-06 | -2.31                                                                          | 8.46E-06 | -0.44                                                | 1.70E-01 |
| Plxna3        | -2.36                                                | 2.98E-07 | -1.71                                                                   | 7.92E-05 | -1.92                                                                          | 1.15E-05 | -0.45                                                | 1.13E-01 |
| Marveld1      | -2.49                                                | 3.17E-07 | -2.95                                                                   | 1.47E-06 | -2.70                                                                          | 8.67E-07 | 0.21                                                 | 4.73E-01 |
| Frem2         | -2.49                                                | 3.29E-07 | -2.74                                                                   | 2.42E-06 | -2.22                                                                          | 5.30E-06 | -0.27                                                | 3.47E-01 |
| Srd5a1        | -2.17                                                | 3.30E-07 | -1.72                                                                   | 3.81E-05 | -1.83                                                                          | 9.56E-06 | -0.34                                                | 1.86E-01 |
| Alox12        | -2.53                                                | 3.30E-07 | -2.41                                                                   | 8.25E-06 | -2.08                                                                          | 1.15E-05 | -0.45                                                | 1.36E-01 |
| 4632428N05Rik | -2.27                                                | 3.36E-07 | -2.12                                                                   | 1.07E-05 | -2.07                                                                          | 4.44E-06 | -0.20                                                | 4.50E-01 |
| NA            | -1.73                                                | 3.81E-07 | -1.37                                                                   | 4.49E-05 | -0.95                                                                          | 3.95E-04 | -0.78                                                | 1.08E-02 |
| Tdh           | -3.39                                                | 4.09E-07 | -2.04                                                                   | 4.39E-04 | -2.10                                                                          | 1.51E-04 | -1.29                                                | 1.76E-02 |
| NA            | -2.35                                                | 4.15E-07 | -2.49                                                                   | 3.96E-06 | -2.79                                                                          | 5.35E-07 | 0.44                                                 | 1.29E-01 |
| NA            | -1.99                                                | 4.23E-07 | -1.59                                                                   | 4.49E-05 | -1.53                                                                          | 2.45E-05 | -0.46                                                | 6.77E-02 |
| Spon2         | -2.58                                                | 4.33E-07 | -2.80                                                                   | 3.51E-06 | -2.44                                                                          | 3.89E-06 | -0.14                                                | 6.72E-01 |
| Cyr61         | -2.21                                                | 4.76E-07 | -2.28                                                                   | 5.09E-06 | -1.84                                                                          | 1.36E-05 | -0.36                                                | 1.77E-01 |
| Slc35f1       | -2.91                                                | 4.80E-07 | -2.66                                                                   | 1.59E-05 | -2.51                                                                          | 1.02E-05 | -0.40                                                | 2.59E-01 |
| B3 gnt8       | -2.91                                                | 4.80E-07 | -1.93                                                                   | 2.34E-04 | -2.12                                                                          | 4.66E-05 | -0.79                                                | 4.37E-02 |
| Ehd2          | -2.16                                                | 4.97E-07 | -2.57                                                                   | 1.88E-06 | -2.07                                                                          | 4.01E-06 | -0.10                                                | 7.27E-01 |
| 4930583H14Rik | -2.16                                                | 5.68E-07 | -1.99                                                                   | 1.69E-05 | -1.91                                                                          | 9.61E-06 | -0.24                                                | 3.57E-01 |

Probe sets with most robust down-regulation obtained by *K5TRF2/G3 Terc<sup>-/-</sup>* versus wild-type comparisons were ranked based on the false detection rate (FDR). *K5TRF2/G3 Terc<sup>-/-</sup>* probe sets show persistent down-regulation when compared to *K5TRF2/G2 Terc<sup>-/-</sup>*, and *G2 Terc<sup>-/-</sup>* keratinocytes. Genes down-regulated in by *K5TRF2/G3 Terc<sup>-/-</sup>* versus wild-type comparisons are also found to be down-regulated in *K5TRF2/G2 Terc<sup>-/-</sup>* versus wild-type comparisons; albeit in some cases at a FDR > 1.00E-1. Also see Figure 5B.

**Table S4. a: Genes with most robust regulation in male PM *K5TRF2* versus male wild type transcriptome comparisons**

| Gene symbol   | <i>male K5TRF2</i> vs. <i>male Wild type</i> |          |
|---------------|----------------------------------------------|----------|
|               | logFC                                        | FDR      |
| Terf2         | 8.41                                         | 5.90E-10 |
| Terf2         | 5.63                                         | 8.82E-07 |
| Hbb-bh1       | 3.55                                         | 2.55E-06 |
| Ptgds         | 3.76                                         | 9.55E-06 |
| Terf2         | 5.54                                         | 1.04E-05 |
| Tyrp1         | 3.39                                         | 1.84E-05 |
| Slc45a2       | 2.68                                         | 2.42E-05 |
| Mcam          | 3.28                                         | 2.63E-05 |
| 3110007F17Rik | 2.36                                         | 3.19E-05 |
| Cpt1c         | 2.02                                         | 6.76E-05 |
| Trpm1         | 3.48                                         | 7.75E-05 |
| Dct           | 2.86                                         | 7.75E-05 |
| Nrg1          | 2.37                                         | 8.06E-05 |
| Nrg1          | 2.35                                         | 8.06E-05 |
| Loxl2         | 2.33                                         | 8.06E-05 |
| Mrpplf4       | 2.26                                         | 9.73E-05 |
| Vim           | 2.39                                         | 1.03E-04 |
| Si            | 2.87                                         | 1.13E-04 |
| Mrpplf4       | 2.18                                         | 1.13E-04 |
| Mlana         | 2.69                                         | 1.26E-04 |
| Dct           | 2.73                                         | 1.33E-04 |
| A830073O21Rik | 1.99                                         | 1.43E-04 |
| Emp3          | 1.93                                         | 1.50E-04 |
| Lgals1        | 2.02                                         | 1.72E-04 |
| Syt4          | 2.00                                         | 1.78E-04 |
| Syt4          | 1.94                                         | 1.78E-04 |
| Plod2         | 1.84                                         | 2.07E-04 |
| Adamts1       | 2.35                                         | 2.14E-04 |
| Ednrb         | 2.14                                         | 2.14E-04 |
| Plat          | 1.76                                         | 2.14E-04 |
| Mamdc2        | 1.67                                         | 2.14E-04 |
| Mc1r          | 2.09                                         | 2.35E-04 |
| Phlda1        | 1.79                                         | 2.35E-04 |
| Gapdhs        | 2.65                                         | 2.58E-04 |
| Slc24a5       | 2.26                                         | 2.58E-04 |
| Plf2          | 2.08                                         | 2.72E-04 |
| Enpp2         | 1.96                                         | 2.88E-04 |
| Syng1         | 1.79                                         | 3.03E-04 |
| Syng1         | 1.81                                         | 3.11E-04 |
| Scrn1         | 1.86                                         | 3.11E-04 |
| C2            | 1.77                                         | 3.11E-04 |
| Bace2         | 2.22                                         | 3.15E-04 |
| C2            | 2.60                                         | 3.17E-04 |
| Adamts1       | 2.30                                         | 3.17E-04 |
| Spr1b         | 1.79                                         | 3.17E-04 |
| Mcam          | 1.42                                         | 3.17E-04 |
| Mcoln3        | 1.98                                         | 3.28E-04 |
| Plat          | 1.82                                         | 3.28E-04 |
| Spr1a         | 1.88                                         | 3.53E-04 |
| Polk          | 1.33                                         | 3.56E-04 |

**Table S4. b**

| Gene symbol   | <i>male K5TRF2</i> vs. <i>male Wild type</i> |          |
|---------------|----------------------------------------------|----------|
|               | logFC                                        | FDR      |
| Pgm5          | -3.02                                        | 1.84E-05 |
| Cd34          | -1.84                                        | 9.29E-05 |
| Fndc1         | -2.25                                        | 1.47E-04 |
| Irs1          | -2.10                                        | 1.72E-04 |
| Fras1         | -2.29                                        | 2.07E-04 |
| Igfbp5        | -1.92                                        | 2.14E-04 |
| 1190002H23Rik | -1.59                                        | 2.72E-04 |
| Grik4         | -1.92                                        | 2.99E-04 |
| BC029169      | -1.47                                        | 2.99E-04 |
| Ccl27         | -2.31                                        | 3.17E-04 |
| Spock2        | -1.63                                        | 3.18E-04 |
| Ccdc80        | -1.53                                        | 3.56E-04 |
| Tmem35        | -1.50                                        | 3.68E-04 |
| Rgs7          | -1.49                                        | 4.37E-04 |
| 1600015H20Rik | -1.74                                        | 4.51E-04 |
| Ogn           | -2.11                                        | 5.67E-04 |
| Tns1          | -1.58                                        | 5.82E-04 |
| Vit           | -1.50                                        | 5.82E-04 |
| Foxp1         | -1.33                                        | 5.82E-04 |
| Cmkor1        | -1.18                                        | 5.82E-04 |
| Selenbp1      | -1.76                                        | 5.89E-04 |
| Cdh4          | -1.29                                        | 6.25E-04 |
| Nfib          | -1.26                                        | 6.63E-04 |
| 2310067E19Rik | -1.12                                        | 7.77E-04 |
| Arhgap25      | -1.37                                        | 9.00E-04 |
| BC029169      | -1.34                                        | 9.62E-04 |
| Prrg3         | -1.10                                        | 9.70E-04 |
| Fgf18         | -1.60                                        | 9.94E-04 |
| Dapk2         | -1.54                                        | 1.00E-03 |
| Echdc3        | -1.19                                        | 1.00E-03 |
| Chst12        | -1.16                                        | 1.03E-03 |
| Gpha2         | -1.25                                        | 1.10E-03 |
| Avpr1a        | -1.24                                        | 1.10E-03 |
| Tulp2         | -1.02                                        | 1.10E-03 |
| Lhx2          | -2.06                                        | 1.12E-03 |
| Hrbl          | -1.18                                        | 1.13E-03 |
| Mrc2          | -1.20                                        | 1.15E-03 |
| Glul          | -1.19                                        | 1.15E-03 |
| Tsc22d3       | -1.58                                        | 1.23E-03 |
| Slc2a5        | -1.57                                        | 1.29E-03 |
| Tsc22d3       | -1.56                                        | 1.33E-03 |
| Tbx3          | -1.18                                        | 1.34E-03 |
| Dtx4          | -1.25                                        | 1.36E-03 |
| Defb2         | -1.38                                        | 1.37E-03 |
| Kif21a        | -1.09                                        | 1.37E-03 |
| Mrc2          | -1.19                                        | 1.38E-03 |
| Ngfr          | -1.21                                        | 1.58E-03 |
| Gucy1b3       | -1.09                                        | 1.70E-03 |
| Ramp1         | -1.25                                        | 1.72E-03 |
| Phf21a        | -1.10                                        | 1.76E-03 |

a. Top 50 upregulated probe sets in PM *K5TRF2* keratinocytes, ranked by increasing FDR. b. Top 50 downregulated probe sets in PM *K5TRF2* keratinocytes, ranked by increasing FDR.

**Table S5. a: Overrepresented in *K5TRF2/G2 Terc<sup>-/-</sup>* and *K5TRF2/G3 Terc<sup>-/-</sup>* females compared to female *Wild type***

| Source   | Pathway                              | Biological functions                                                                                                                                      | <i>K5TRF2/G3<br/>Terc<sup>-/-</sup></i> FDR | <i>K5TRF2/G2<br/>Terc<sup>-/-</sup></i> FDR |
|----------|--------------------------------------|-----------------------------------------------------------------------------------------------------------------------------------------------------------|---------------------------------------------|---------------------------------------------|
| Biocarta | mTOR                                 | mammalian target of rapamycin (mTOR) senses mitogenic factors and nutrients, including ATP, and induces cell proliferation                                | 0.116                                       | n.a.                                        |
| Biocarta | Akt                                  | second messenger PIP3 promotes cell survival by activating the anti-apoptotic kinase AKT                                                                  | 0.143                                       | n.a.                                        |
| Biocarta | eIF4                                 | the eIF-4F complex recognizes 5' mRNA caps, recruits RNA helicases, and maintains mRNA-ribosome bridging.                                                 | 0.181                                       | n.a.                                        |
| Biocarta | Ecm                                  | extracellular matrix induces integrin-mediated FAK phosphorylation in epithelial cells, leading to PI3 and MAP kinase activation and actin reorganization | 0.197                                       | n.a.                                        |
| Reactome | ERK/MAPK targets                     | ERK/MAPK kinases have a number of targets within the nucleus, usually transcription factors or other kinases                                              | 0.246                                       | 0.236                                       |
| Reactome | FGFR ligand binding and activation   | a series of signals generated as a consequence of a fibroblast growth factor receptor binding to one of its physiological ligands                         | 0.107                                       | n.s.                                        |
| Reactome | FGFR4 ligand binding and activation  | a series of signals generated as a consequence of a fibroblast growth factor receptor binding to one of its physiological ligands                         | 0.114                                       | n.s. (0.254)                                |
| Reactome | FGFR1 ligand binding and activation  | a series of signals generated as a consequence of a fibroblast growth factor receptor binding to one of its physiological ligands                         | 0.127                                       | n.s.                                        |
| Reactome | FGFR2 ligand binding and activation  | a series of signals generated as a consequence of a fibroblast growth factor receptor binding to one of its physiological ligands                         | 0.128                                       | n.s.                                        |
| Reactome | FGFR2C ligand binding and activation | a series of signals generated as a consequence of a fibroblast growth factor receptor binding to one of its physiological ligands                         | 0.146                                       | n.s.                                        |





**Table S5. c: Overrepresented in Wild type males compared to *KSTRF2* males**

| Source   | Pathway                                                 | Description                                                                                      | FDR q-value |
|----------|---------------------------------------------------------|--------------------------------------------------------------------------------------------------|-------------|
| KEGG     | mismatch repair                                         | corrects DNA mismatches generated during DNA replication                                         | 0.008       |
| KEGG     | base excision repair                                    | removal of altered base by hydrolytic removal                                                    | 0.115       |
| KEGG     | nucleotide excision repair                              | removal of region around DNA damage and subsequent gap filling                                   | 0.116       |
| Reactome | gap-filling DNA repair synthesis and ligation in GG NER | DNA gap filling after removal of pyrimidine dimers during global genomic nuclear excision repair | 0.142       |
| GeneMAPP | DNA replication reactome                                | network of interacting proteins and enzymes required for DNA replication                         | 0.220       |
| Reactome | DNA strand elongation                                   | cell cycle, mitotic                                                                              | 0.253       |
| KEGG     | DNA replication                                         | network of interacting proteins and enzymes required for DNA replication                         | 0.014       |

**Table S5. d: Overrepresented in *K5TRF2* males compared to Wild type males**

| Source   | Pathway                      | Description                                                                                                                                                                                                             | FDR q-value |
|----------|------------------------------|-------------------------------------------------------------------------------------------------------------------------------------------------------------------------------------------------------------------------|-------------|
| KEGG     | Toll-like receptor signaling | activation of innate immunity; inducing production of proinflammatory cytokines and costimulatory molecules                                                                                                             | 0.004       |
| KEGG     | ErbB signaling               | ErbB family of receptor tyrosine kinases; regulating diverse biologic responses, including proliferation, differentiation, cell motility, and survival;MAPK pathway is a common target downstream of all ErbB receptors | 0.091       |
| BioCarta | Jak-Stat signaling           | Transduction of signals for development and homeostasis; also mediate the recruitment of other molecules such as the MAP kinases                                                                                        | 0.186       |
| KEGG     | p53 signaling                | activation by stress signals, including DNA damage, oxidative stress and activated oncogenes. activation of p53-regulated genes results in cell cycle arrest, cellular senescence or apoptosis.                         | 0.183       |
| KEGG     | apoptosis                    | controlled mechanisms of cell death involved in the regulation of tissue homeostasis                                                                                                                                    | 0.191       |
| GeneMAPP | apoptosis                    | controlled mechanisms of cell death involved in the regulation of tissue homeostasis                                                                                                                                    | 0.196       |
| KEGG     | mTOR signaling               | Mammalian target of rapamycin (mTOR) senses mitogenic factors and nutrients, including ATP, and induces cell proliferation                                                                                              | 0.262       |
| KEGG     | NTHI                         |                                                                                                                                                                                                                         | 0.116       |

Pathway analysis based on female PM *K5TRF2/G2-G3 Terc<sup>-/-</sup>* versus female wild type transcriptome comparisons and on male wild-type versus male PM *K5TRF2* transcriptome comparisons.

a. Pathways enriched in *K5TRF2/G3 Terc<sup>-/-</sup>* (FDR < 0.25) are listed. Over-representation of genes involved in the mTOR, eIF4a and Akt pathways suggests the activation of a cell survival program to escape cellular senescence induced by critically short telomeres. In addition ERK/MAPK targets and FGF signalling were found to be augmented in *K5TRF2/G3 Terc<sup>-/-</sup>* cells. n.a., not analyzed b. Pathways enriched in wild-type cells (FDR < 0.25) are listed. Over-representation of genes involved in various aspects of DNA damage repair as well as p53 signalling. Activation of a series of mitotic cell cycle regulation pathways reflects an increased proliferative activity of wild type cells compared to *K5TRF2/G2-3 Terc<sup>-/-</sup>* keratinocytes. Pathway activation is reduced when compared with *K5TRF2/G2 Terc<sup>-/-</sup>* keratinocytes with higher telomere reserve. c. Pathways enriched in wild-type cells (FDR < 0.25) are listed. Over-representation of genes involved in various aspects of DNA damage repair and mitotic cell cycle regulation pathways. d. Pathways enriched in male *K5TRF2* keratinocytes (FDR < 0.25) are listed. Over-representation of genes involved in the mTOR and ErbB signalling suggests the activation of a cell survival program responding to the activation of apoptosis pathways induced by critically short telomeres and p53 signalling pathways

**Table S6. a: Overview on over-lapping gene expression changes in *Ercc1*<sup>-/-</sup> mice (4) vs *K5TRF2/G3 Terc*<sup>-/-</sup> primary keratinocytes and ageing mice (4) vs *K5TRF2/G3 Terc*<sup>-/-</sup> primary keratinocytes**

| <i>Ercc1</i> <sup>-/-</sup> vs. Wild type | <i>K5TRF2/G3 Terc</i> <sup>-/-</sup> vs. Wild type |
|-------------------------------------------|----------------------------------------------------|
| up-regulated                              | log <sub>2</sub> ratio                             |
| Srpk2                                     | 1.26                                               |
| Sfrs8                                     | 1.38                                               |
| Mta3                                      | 0.59                                               |
| Mdm2                                      | 0.67                                               |
| Lgals7                                    | 1.09                                               |
| Aox1                                      | 1.59                                               |
| Slc6a6                                    | 3.29                                               |
| Cxadr                                     | 1.62                                               |
| Malat1                                    | 1.59                                               |
| Eif5                                      | 1.15                                               |
| Prss8                                     | 1.71                                               |
| Ccng1                                     | 0.87                                               |
| Slc15a4                                   | 0.92                                               |
| Plekhb2                                   | 1.06                                               |
| Prune                                     | 0.62                                               |
| Wbscr27                                   | 0.67                                               |
| Ssh1                                      | 0.57                                               |
| Cdc42bpg                                  | 1.39                                               |
| Rhoc                                      | 0.80                                               |
| Cpm                                       | 4.07                                               |
| Gtf2ird1                                  | 1.66                                               |
| Krt18                                     | 2.04                                               |
| Ubd                                       | 1.62                                               |
| Ak2                                       | 0.67                                               |
| Anxa3                                     | 1.72                                               |
| F11r                                      | 0.97                                               |
| Cldn1                                     | 0.96                                               |
| Jarid1a                                   | 0.63                                               |
| Slc20a1                                   | 0.84                                               |
| Csnk1d                                    | 0.98                                               |
| Cyp2d9                                    | 0.93                                               |
| Slpi                                      | 2.80                                               |
| Txnip                                     | 2.13                                               |
| Aatf                                      | 0.67                                               |
| Sox4                                      | 1.94                                               |
| Arhgef7                                   | 0.87                                               |
| Dusp7                                     | 0.92                                               |
| Krt23                                     | 2.80                                               |
| Pde4b                                     | 0.95                                               |
| Hist1 h1c                                 | 0.77                                               |
| Nfe2l2                                    | 1.81                                               |
| Rhod                                      | 1.01                                               |
| Sbsn                                      | 1.39                                               |
| Lhx6                                      | 0.88                                               |
| Ocln                                      | 0.92                                               |
| Tnfaip2                                   | 1.03                                               |
| Litaf                                     | 0.92                                               |
| lpmk                                      | 1.53                                               |
| Slk                                       | 1.35                                               |
| Gnb2l1                                    | 0.72                                               |
| Cdkn1c                                    | 0.94                                               |
| Tmcc3                                     | 0.92                                               |
| Gmeb1                                     | 0.66                                               |
| Klk1                                      | 0.97                                               |
| Rnf24                                     | 1.23                                               |
| Foxk1                                     | 0.67                                               |
| Cxcl16                                    | 1.52                                               |
| C1qtnf4                                   | 0.78                                               |
| Pcolce2                                   | 1.04                                               |
| Chka                                      | 1.71                                               |
| Ptpr                                      | 1.86                                               |
| Marcks                                    | 0.67                                               |
| Id4                                       | 1.01                                               |
| Arhgef2                                   | 0.91                                               |
| Alcam                                     | 1.16                                               |

**Table S6. b**

| <i>Erc1</i> <sup>-/-</sup> vs. Wild type | <i>K5TRF2/G3 Terc</i> <sup>-/-</sup> vs. Wild type |
|------------------------------------------|----------------------------------------------------|
| up-regulated                             | log(2) ratio                                       |
| Srpk2                                    | 1.26                                               |
| Sfrs8                                    | 1.38                                               |
| Mta3                                     | 0.59                                               |
| Mdm2                                     | 0.67                                               |
| Lgals7                                   | 1.09                                               |
| Aox1                                     | 1.59                                               |
| Slc6a6                                   | 3.29                                               |
| Cxadr                                    | 1.62                                               |
| Malat1                                   | 1.59                                               |
| Eif5                                     | 1.15                                               |
| Prss8                                    | 1.71                                               |
| Ccng1                                    | 0.87                                               |
| Slc15a4                                  | 0.92                                               |
| Plekhb2                                  | 1.06                                               |
| Prune                                    | 0.62                                               |
| Wbscr27                                  | 0.67                                               |
| Ssh1                                     | 0.57                                               |
| Cdc42bpg                                 | 1.39                                               |
| Rhoc                                     | 0.80                                               |
| Cpm                                      | 4.07                                               |
| Gtf2ird1                                 | 1.66                                               |
| Krt18                                    | 2.04                                               |
| Ubd                                      | 1.62                                               |
| Ak2                                      | 0.67                                               |
| Anxa3                                    | 1.72                                               |
| F11r                                     | 0.97                                               |
| Cldn1                                    | 0.96                                               |
| Jarid1a                                  | 0.63                                               |
| Slc20a1                                  | 0.84                                               |
| Csnk1d                                   | 0.98                                               |
| Cyp2d9                                   | 0.93                                               |
| Slpi                                     | 2.80                                               |
| Txnip                                    | 2.13                                               |
| Aatf                                     | 0.67                                               |
| Sox4                                     | 1.94                                               |
| Arhgef7                                  | 0.87                                               |
| Dusp7                                    | 0.92                                               |
| Krt23                                    | 2.80                                               |
| Pde4b                                    | 0.95                                               |
| Hist1 h1c                                | 0.77                                               |
| Nfe2l2                                   | 1.81                                               |
| Rhod                                     | 1.01                                               |
| Sbsn                                     | 1.39                                               |
| Lhx6                                     | 0.88                                               |
| Ocln                                     | 0.92                                               |
| Tnfaip2                                  | 1.03                                               |
| Litaf                                    | 0.92                                               |
| Ipmk                                     | 1.53                                               |
| Sik                                      | 1.35                                               |
| Gnb2l1                                   | 0.72                                               |
| Cdkn1c                                   | 0.94                                               |
| Tmcc3                                    | 0.92                                               |
| Gmeb1                                    | 0.66                                               |
| Klk1                                     | 0.97                                               |
| Rnf24                                    | 1.23                                               |
| Foxk1                                    | 0.67                                               |
| Cxcl16                                   | 1.52                                               |
| C1qtnf4                                  | 0.78                                               |
| Pcolce2                                  | 1.04                                               |
| Chka                                     | 1.71                                               |
| Ptpre                                    | 1.86                                               |
| Marcks                                   | 0.67                                               |
| Id4                                      | 1.01                                               |
| Arhgef2                                  | 0.91                                               |
| Alcam                                    | 1.16                                               |

**Table S6. c**

| Wild type 130 weeks<br>vs. Wild type 8 weeks | <i>K5TRF2/G3 Terc<sup>-/-</sup></i><br>vs. Wild type |
|----------------------------------------------|------------------------------------------------------|
| up-regulated                                 | log <sub>2</sub> ratio                               |
| Hist1 h1c                                    | 0.77                                                 |
| Tacstd2                                      | 0.82                                                 |
| Cd36                                         | 0.87                                                 |

Table S6. d

| Wild type 130 weeks<br>vs. Wild type 8 weeks | <i>K5TRF2/G3 Terc<sup>-/-</sup></i><br>vs. Wild type | Wild type 130 weeks<br>vs. Wild type 8 weeks | <i>K5TRF2/G3 Terc<sup>-/-</sup></i><br>vs. Wild type |
|----------------------------------------------|------------------------------------------------------|----------------------------------------------|------------------------------------------------------|
| down-regulated                               | log <sub>2</sub> ratio                               | Marveld2                                     | -0.70                                                |
| Hunk                                         | -2.09                                                | Spnb3                                        | -0.83                                                |
| Rapgef3                                      | -1.23                                                | Nupl2                                        | -0.90                                                |
| Pias2                                        | -0.74                                                | Alas2                                        | -1.32                                                |
| Commd5                                       | -0.92                                                | Rtn4rl1                                      | -1.52                                                |
| Calm1                                        | -0.58                                                | Armc8                                        | -0.97                                                |
| Ddit4l                                       | -0.62                                                | Ralgps2                                      | -1.04                                                |
| Sc5d                                         | -0.71                                                | Mmp15                                        | -1.56                                                |
| Hsd3b2                                       | -1.47                                                | Sdha                                         | -0.82                                                |
| Gspt1                                        | -2.13                                                | Akr1c13                                      | -0.89                                                |
| Nnt                                          | -1.24                                                | Higd1a                                       | -0.69                                                |
| Hps4                                         | -1.32                                                | P2ry5                                        | -1.82                                                |
| Srd5a1                                       | -2.17                                                | Hsd17b7                                      | -0.68                                                |
| Asb3                                         | -0.95                                                | Ccbl1                                        | -1.94                                                |
| Polr3k                                       | -0.91                                                | Mrp63                                        | -0.76                                                |
| Egfr                                         | -2.04                                                | Map3k12                                      | -1.00                                                |
| Vcl                                          | -0.78                                                | Pdxk                                         | -0.72                                                |
| Rasl11b                                      | -1.70                                                | Ppp1r3c                                      | -1.98                                                |
| Gtf3c3                                       | -1.26                                                | Trim37                                       | -1.33                                                |
| Acat2                                        | -0.83                                                | B3 galnt2                                    | -0.68                                                |
| Nfic                                         | -0.93                                                | Idh1                                         | -0.54                                                |
| Crot                                         | -1.14                                                | Hspa4                                        | -1.93                                                |
| Pigq                                         | -1.22                                                | Zfp294                                       | -0.59                                                |
| Disp1                                        | -1.49                                                | Gldc                                         | -1.62                                                |
| Mrpl15                                       | -0.57                                                | Fbxo25                                       | -1.06                                                |
| Mmab                                         | -1.75                                                | Hexim1                                       | -0.84                                                |
| Akr1c19                                      | -1.32                                                | Mrpl44                                       | -0.67                                                |
| Cog8                                         | -0.61                                                | Hsd3b6                                       | -0.90                                                |
| Wdr59                                        | -1.36                                                | Sox6                                         | -1.30                                                |
| Usp40                                        | -1.01                                                | Pes1                                         | -0.95                                                |
| Nsdhl                                        | -1.58                                                | As3mt                                        | -1.13                                                |
| Ikbkg                                        | -1.26                                                | Trip4                                        | -1.56                                                |
| Mcm10                                        | -0.96                                                | Akap1                                        | -0.85                                                |
| Tial1                                        | -1.23                                                | Mtap                                         | -1.42                                                |
| Zfp524                                       | -0.76                                                | Ttc14                                        | -0.72                                                |
| Dnajc11                                      | -1.36                                                | Lmbr1                                        | -0.77                                                |
| Gtf3c1                                       | -0.95                                                | Mkks                                         | -1.78                                                |
| Edaradd                                      | -1.99                                                | Itpr2                                        | -0.76                                                |
| Lactb2                                       | -1.86                                                | Sh2d4a                                       | -0.71                                                |
| Thtpa                                        | -1.44                                                | Btrc                                         | -0.76                                                |
| Slc18a1                                      | -1.10                                                | Bri3bp                                       | -1.59                                                |
| Fzd6                                         | -0.93                                                | Znrf1                                        | -0.99                                                |
| Grb14                                        | -1.51                                                | Tacr3                                        | -0.55                                                |
| Yme111                                       | -0.89                                                | Oxa1l                                        | -1.29                                                |
| Parp1                                        | -2.40                                                | Lig3                                         | -1.81                                                |
| Dot1l                                        | -0.48                                                | Det1                                         | -1.25                                                |
| Senp7                                        | -1.17                                                | Psip1                                        | -1.58                                                |
| Clspn                                        | -1.37                                                | Usp10                                        | -0.87                                                |
| Nudcd1                                       | -1.52                                                | Rabif                                        | -0.63                                                |
| Zfp386                                       | -1.20                                                | Cpt2                                         | -1.18                                                |
| Pdcl                                         | -0.54                                                | Aasdhppt                                     | -0.98                                                |
| Bbs7                                         | -1.13                                                | Ngfr                                         | -1.76                                                |
| Rab7l1                                       | -2.43                                                | Mrpl36                                       | -1.65                                                |
| Ttc19                                        | -1.01                                                | Gcsh                                         | -1.31                                                |
| Nup37                                        | -2.11                                                | Fusip1                                       | -0.99                                                |
| Vegfa                                        | -0.94                                                | Oma1                                         | -1.05                                                |
| Dpp4                                         | -2.19                                                | Manea                                        | -0.78                                                |
| Spsb4                                        | -2.13                                                | Brwd2                                        | -0.93                                                |
| Acsl1                                        | -1.27                                                | Ephx2                                        | -1.50                                                |
| Capns2                                       | -1.33                                                |                                              |                                                      |
| Nr2c1                                        | -0.78                                                |                                              |                                                      |
| Selenbp1                                     | -1.94                                                |                                              |                                                      |
| Hsd12                                        | -1.49                                                |                                              |                                                      |



**Table S6. e**

| Wild type 16 weeks vs.<br>Wild type 8 weeks | <i>K5TRF2/IG3 Terc<sup>-/-</sup></i> vs.<br>Wild type |
|---------------------------------------------|-------------------------------------------------------|
| up-regulated                                | log <sub>2</sub> ratio                                |
| Kif1c                                       | 1.12                                                  |
| Tsc1                                        | 0.81                                                  |
| Ugcg                                        | 1.20                                                  |
| Srpk2                                       | 1.26                                                  |
| Htatsf1                                     | 0.80                                                  |
| Cct2                                        | 0.83                                                  |
| Tiam1                                       | 1.10                                                  |
| Rb1cc1                                      | 0.84                                                  |
| Vapb                                        | 1.30                                                  |
| Ppih                                        | 1.00                                                  |
| Krtap6-3                                    | 1.50                                                  |
| Cry2                                        | 1.51                                                  |
| Ar15b                                       | 0.76                                                  |
| Atp1b1                                      | 1.41                                                  |
| Slc15a4                                     | 0.92                                                  |
| Centa2                                      | 0.58                                                  |
| Gpd2                                        | 0.60                                                  |
| Gltscr2                                     | 0.67                                                  |
| Tfdp2                                       | 2.08                                                  |
| Ssh1                                        | 0.57                                                  |
| Glrx                                        | 0.67                                                  |
| Sh3bp2                                      | 1.30                                                  |
| Ankrd17                                     | 1.22                                                  |
| Lmo7                                        | 0.85                                                  |
| Eef2                                        | 1.00                                                  |
| Cdc42bpg                                    | 1.39                                                  |
| Oraov1                                      | 0.72                                                  |
| Hlf                                         | 1.08                                                  |
| Eif4e2                                      | 0.55                                                  |
| Por                                         | 1.31                                                  |
| Pdpk1                                       | 1.34                                                  |
| Rab22a                                      | 0.87                                                  |
| Kif13a                                      | 1.03                                                  |
| Riok3                                       | 0.84                                                  |
| Arhgef10                                    | 0.82                                                  |
| Jarid1a                                     | 0.63                                                  |
| Pik3cb                                      | 1.06                                                  |
| Zfp91                                       | 1.81                                                  |
| Gabarapl1                                   | 1.68                                                  |
| Ube2e2                                      | 1.09                                                  |
| Ipo7                                        | 1.04                                                  |
| Eif2c2                                      | 0.60                                                  |
| Clk4                                        | 0.82                                                  |
| Prodh2                                      | 0.53                                                  |
| Tcf12                                       | 1.36                                                  |
| Siah1a                                      | 0.92                                                  |
| Leng1                                       | 0.57                                                  |
| Nat13                                       | 1.02                                                  |
| Tollip                                      | 1.36                                                  |
| Cyp51                                       | 0.76                                                  |
| Cpsf6                                       | 1.16                                                  |
| Ccnt2                                       | 1.31                                                  |
| Eif2 s3x                                    | 1.11                                                  |
| Fbxo30                                      | 0.89                                                  |
| Ndel1                                       | 0.89                                                  |
| Bach1                                       | 0.96                                                  |
| Il6 st                                      | 1.18                                                  |
| Per2                                        | 0.75                                                  |
| Il18                                        | 2.20                                                  |
| Ddx3x                                       | 0.85                                                  |
| Hipk1                                       | 1.30                                                  |

**Table S6. f**

| Wild type 16 weeks vs.<br>Wild type 8 weeks | <i>K5TRF2/G3 Terc<sup>-/-</sup></i><br>vs. Wild type |
|---------------------------------------------|------------------------------------------------------|
| down-regulated                              | log <sub>2</sub> ratio                               |
| Hsd12                                       | -1.49                                                |
| Selenbp1                                    | -1.94                                                |
| Rtn4r11                                     | -1.52                                                |
|                                             | -0.58                                                |
| Neu3                                        | -0.96                                                |
| Nrp1                                        | -0.86                                                |
| Iars                                        | -0.81                                                |
| Lap3                                        | -1.01                                                |
| Hsd3b2                                      | -1.47                                                |
| Galc                                        | -0.84                                                |
| Sdha                                        | -0.82                                                |
| Spon2                                       | -2.58                                                |
| Irf2bp2                                     | -1.07                                                |
| P2ry5                                       | -1.82                                                |
| Tmem38a                                     | -0.60                                                |
| Myom2                                       | -4.41                                                |
| Ccbl1                                       | -1.94                                                |
| Zfand5                                      | -0.62                                                |
| Hps4                                        | -1.32                                                |
| Mrp63                                       | -0.76                                                |
| Arhgef19                                    | -1.81                                                |
| Srd5a1                                      | -2.17                                                |
| Gnai2                                       | -0.83                                                |
| Mef2c                                       | -1.01                                                |
| Sparc                                       | -1.51                                                |
| Ppp1r3c                                     | -1.98                                                |
| Gtpbp3                                      | -0.82                                                |
| Epb4.1l1                                    | -0.80                                                |
| Nav1                                        | -2.02                                                |
| Igfbp2                                      | -1.25                                                |
| Gldc                                        | -1.62                                                |
| Crot                                        | -1.14                                                |
| Sulf1                                       | -0.95                                                |
| Pigq                                        | -1.22                                                |
| Hsd3b6                                      | -0.90                                                |
| Col4a1                                      | -0.81                                                |
| Olah                                        | -1.64                                                |
| Ttc14                                       | -0.72                                                |
| Spag5                                       | -1.08                                                |
| Ikbkg                                       | -1.26                                                |
| Btg2                                        | -1.21                                                |
| Aldh18a1                                    | -3.15                                                |
| Gatm                                        | -1.07                                                |
| Gtf3c1                                      | -0.95                                                |
| Itpr2                                       | -0.76                                                |
| Edaradd                                     | -1.99                                                |
| Pja1                                        | -1.29                                                |
| Cd44                                        | -1.37                                                |
| Tor3a                                       | -1.14                                                |
| Grb14                                       | -1.51                                                |
| Sipa1l1                                     | -1.24                                                |
| Prkcz                                       | -0.71                                                |
| Ubap2l                                      | -1.30                                                |
| Prelp                                       | -0.98                                                |
| Mocos                                       | -0.60                                                |
| Aasdhpt                                     | -0.98                                                |
| Nudcd1                                      | -1.52                                                |
| Mrpl36                                      | -1.65                                                |
| Pdcl                                        | -0.54                                                |
| Serpinh1                                    | -1.71                                                |
| Brwd2                                       | -0.93                                                |
| Dpp4                                        | -2.19                                                |

Wild type 16 weeks vs.  
Wild type 8 weeks*K5TRF2/G3 Terc<sup>-/-</sup>*  
vs. Wild type

|        |       |
|--------|-------|
| Bcl11a | -1.54 |
| Imp2l  | -0.91 |
| Acsl1  | -1.27 |

a. Summary of genes up-regulated in both mouse ageing models. b. Summary of genes up-regulated in both mouse ageing models. Log<sub>2</sub> ratios in *K5TRF2/G3 Terc<sup>-/-</sup>* vs. Wild type transcriptome comparisons are indicated. c. Summary of genes up-regulated in both mouse models. d. Summary of genes down-regulated in both mouse ageing models. Log<sub>2</sub> ratios in *K5TRF2/G3 Terc<sup>-/-</sup>* vs. Wild type transcriptome comparisons are indicated. e. Summary of genes up-regulated in both mouse models. f. Summary of genes down-regulated in both mouse ageing models. Log<sub>2</sub> ratios in *K5TRF2/G3 Terc<sup>-/-</sup>* vs. Wild type transcriptome comparisons are indicated.

**Table S7. a: Overview on over-lapping gene expression changes in ageing mouse neocortex (5) and *K5TRF2/G3 Terc<sup>-/-</sup>* primary keratinocytes**

| Neocortex old<br>vs. Neocortex young | <i>K5TRF2/G3 Terc<sup>-/-</sup></i><br>vs. Wild type |
|--------------------------------------|------------------------------------------------------|
| up-regulated                         | (log <sub>2</sub> ) ratio                            |
| Srrm1                                | 1.08                                                 |
| Ppp1r12b                             | 0.87                                                 |
| Rab14                                | 1.07                                                 |
| Tmem87a                              | 0.64                                                 |
| 5830417C01Rik                        | 1.09                                                 |
| 4930504E06Rik                        | 0.84                                                 |

**Table S7. b**

| Neocortex old<br>vs. Neocortex young | <i>K5TRF2/G3 Terc<sup>-/-</sup></i><br>vs. Wild type |
|--------------------------------------|------------------------------------------------------|
| down-regulated                       | (log <sub>2</sub> ) ratio                            |
| Atp8b3                               | -0.95                                                |
| Pisd                                 | -0.93                                                |

a. Summary of genes up-regulated in both mouse models. b. Summary of genes down-regulated in both mouse ageing models. Log<sub>2</sub> ratios in *K5TRF2/G3 Terc<sup>-/-</sup>* vs. Wild type transcriptome comparisons are indicated.

**Table S8. a: Biological themes in transcriptome intersections of ageing models and *K5TRF2/G3 Terc*<sup>-/-</sup> keratinocytes**

Intersection *K5TRF2/G3 Terc*<sup>-/-</sup> vs. Wild type with *Erc1*<sup>-/-</sup> vs. Wild type

|                            |       |                |                  |
|----------------------------|-------|----------------|------------------|
| down-regulated             | FDR   | Process number | Term of database |
| Cellular metabolic process | 0.029 | GO:0044237     | GO level 3       |
| up-regulated               | FDR   | Process number | Term of database |
| No significant terms       | -     | -              | -                |

**Table S8. b**Intersection *K5TRF2/G3 Terc<sup>-/-</sup>* vs. Wild type with Wild type 130 weeks vs. Wild type 8 weeks

|                              |       |                |                  |
|------------------------------|-------|----------------|------------------|
| down-regulated               | FDR   | Process number | Term of database |
| Cellular metabolic process   | 0.005 | GO:0044237     | GO level 3       |
| Steroid biosynthetic process | 0.022 | GO:0006694     | GO level 7       |
| up-regulated                 | FDR   | Process number | Term of database |
| No significant terms         | -     | -              | -                |

**Table S8. c**Intersection *K5TRF2/G3 Terc<sup>-/-</sup>* vs. Wild type with Wild type 16 weeks vs. Wild type 8 weeks

|                               |       |                |                  |
|-------------------------------|-------|----------------|------------------|
| Down-regulated                | FDR   | Process number | Term of database |
| Biosynthetic process          | 0.010 | GO:0009058     | GO level 3       |
| Cellular biosynthetic process | 0.046 | GO:0044249     | GO level 4       |
| up-regulated                  | FDR   | Process number | Term of database |
| mTOR signaling pathway        | 0.043 | mm04150        | KEGG             |

Transcriptome intersections shown in Supplementary Figure 5a,b were analysed for the presence of over-represented biological pathways. a. Intersection of *K5TRF2/G3 Terc<sup>-/-</sup>* vs. Wild type with *Ercc1<sup>-/-</sup>* vs. Wild type (4) and b. Intersections of *K5TRF2/G3 Terc<sup>-/-</sup>* vs. Wild type with Wild type 130 weeks vs. Wild type 8 weeks (4) transcriptomes do not show up-regulation of a relevant biological process. c. Intersections of *K5TRF2/G3 Terc<sup>-/-</sup>* vs. Wild type with Wild type 16 weeks vs. Wild type 8 weeks (4) indicate an up-regulation of the mTOR pathway. mTOR pathway members Eif4e2, Pdpk1 and Tsc1 are up-regulated in *K5TRF2/G3 Terc<sup>-/-</sup>* keratinocytes.
